# Supplementary material for: New Pyrimidine and Pyridine Derivatives as Multitarget Cholinesterase Inhibitors: Design, Synthesis, and In Vitro and In Cellulo Evaluation
Source: PubMed Central journal article supplement (PMC8569681; doi:10.1021/acschemneuro.1c00485), 2021-10-15
Supplement: cn1c00485_si_008.pdf [file cn1c00485_si_008.pdf]

## SUPPORTING INFORMATION

# New pyrimidine and pyridine derivatives as multitarget cholinesterases inhibitors: design, synthesis, and *in vitro* and *in cellulo* evaluation

Martina Bortolami <sup>a</sup>, Fabiana Pandolfi <sup>a</sup>, Valeria Tudino <sup>b</sup>, Antonella Messori <sup>b</sup>, Valentina Noemi Madaia <sup>b</sup>, Daniela De Vita <sup>c</sup>, Roberto Di Santo <sup>b,d</sup>, Roberta Costi <sup>b,d</sup>, Isabella Romeo <sup>e,f</sup>, Stefano Alcaro <sup>e,f,\*</sup>, Marisa Colone <sup>g</sup>, Annarita Stringaro <sup>g</sup>, Alba Espargaró <sup>h</sup>, Raimon Sabatè <sup>h</sup>, Luigi Scipione <sup>b,\*</sup>

<sup>a</sup> Department of Scienze di Base e Applicate per l'Ingegneria, Sapienza University of Rome, via  
Castro Laurenziano 7, I-00161, Rome, Italy

<sup>b</sup> Department of Chimica e Tecnologia del Farmaco, Sapienza University of Rome, Piazzale Aldo  
Moro 5, 00185, Rome, Italy

<sup>c</sup> Department of Environmental Biology, Sapienza University of Rome, Piazzale Aldo Moro 5,  
00185, Rome, Italy

<sup>d</sup> Istituto Pasteur, Fondazione Cenci Bolognetti, Department of Chemistry and Technology of Drug,  
Sapienza University of Rome, Piazzale Aldo Moro 5, 00185, Rome, Italy

<sup>e</sup> Net4Science s.r.l., Campus universitario "S. Venuta", Viale Europa, 88100, Catanzaro, Italy

<sup>f</sup> Dipartimento di Scienze della Salute, Università "Magna Græcia" di Catanzaro, Viale Europa,  
88100, Catanzaro, Italy

<sup>g</sup> National Center for Drug Research and Evaluation, Istituto Superiore di Sanità, Viale Regina  
Elena, 00161, Rome, Italy

<sup>h</sup> Department of Pharmacy and Pharmaceutical Technology and Physical-Chemistry, Faculty of Pharmacy and Food Sciences, University of Barcelona, Avda. Joan XXIII, 27-31 Barcelona, Catalonia, Spain

\*For L.S.: phone, +39-06-49913737; email, luigi.scipione@uniroma1.it; for S.A.: phone, +39-0961-3694198; email, alcaro@unicz.it.

### Table of contents

|                                                                                             |         |
|---------------------------------------------------------------------------------------------|---------|
| Dixon's plot of selected compounds towards <i>EeAChE</i> and <i>eqBChE</i> (Figures S1-S12) | S3-S8   |
| IC <sub>50</sub> graph of compound 20 towards <i>EeAChE</i> (Figure S13)                    | S9      |
| Molecular docking studies (Figures S14-S17, Table S1)                                       | S10-S13 |
| UV-Vis titrations spectra and Job's plots for selected compounds (Figures S18-S46)          | S14-S30 |

## Dixon's plot of selected compounds towards *EeAChE* and *eqBChE*

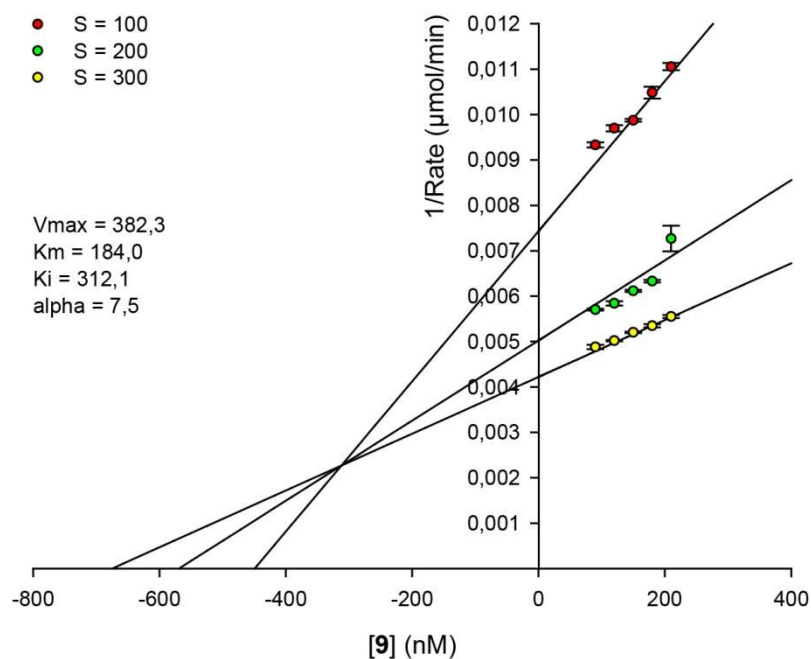

**Figure S1.** Dixon's plot obtained for **9** (90-210 nM), in presence of *EeAChE* (0.0833 U/mL) and ASCh (100-300  $\mu\text{M}$ ). Mixed inhibition mechanism was observed ( $K_i = 0.312 \pm 0.108 \mu\text{M}$ ,  $R^2 = 0.982$ ).

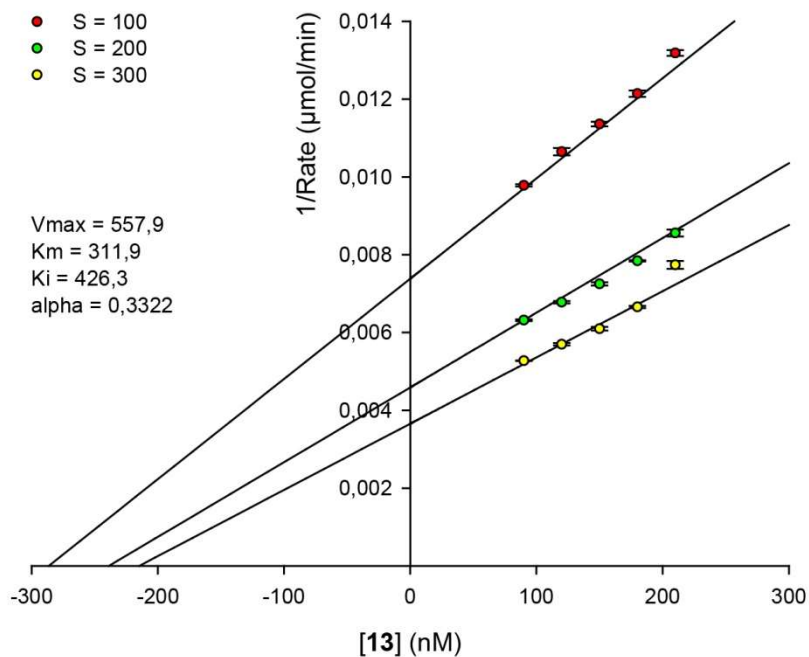

**Figure S2.** Dixon's plot obtained for **13** (90-210 nM), in presence of *EeAChE* (0.0833 U/mL) and ASCh (100-300  $\mu\text{M}$ ). Mixed inhibition mechanism was observed ( $K_i = 0.426 \pm 0.132 \mu\text{M}$ ,  $R^2 = 0.991$ ).

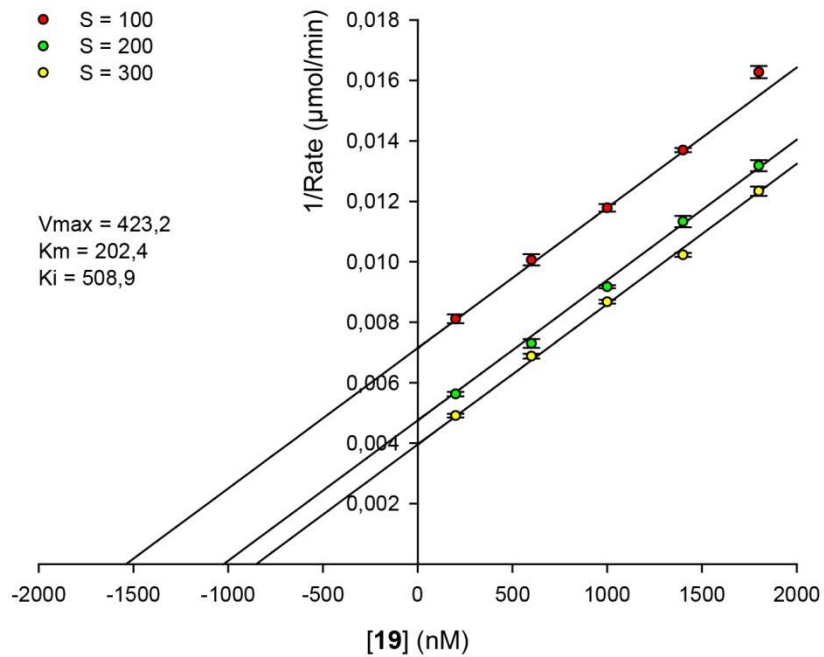

**Figure S3.** Dixon's plot obtained for **19** (200-1800 nM), in presence of *EeAChE* (0.0833 U/mL) and ASCh (100-300  $\mu\text{M}$ ). Uncompetitive inhibition mechanism was observed ( $K_i = 0.509 \pm 0.018 \mu\text{M}$ ,  $R^2 = 0.992$ ).

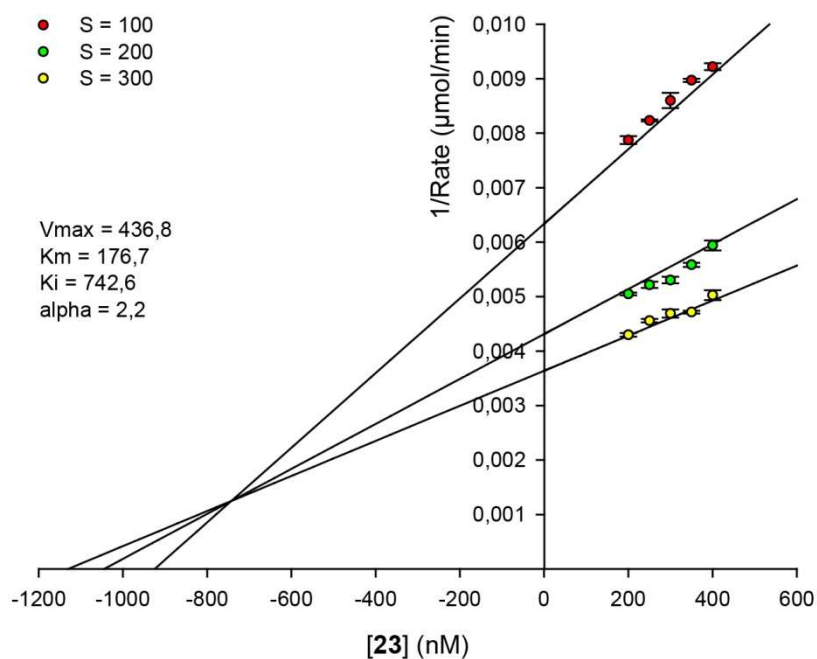

**Figure S4.** Dixon's plot obtained for **23** (200-400 nM), in presence of *EeAChE* (0.0833 U/mL) and ASCh (100-300  $\mu\text{M}$ ). Mixed inhibition mechanism was observed ( $K_i = 0.743 \pm 0.316 \mu\text{M}$ ,  $R^2 = 0.983$ ).

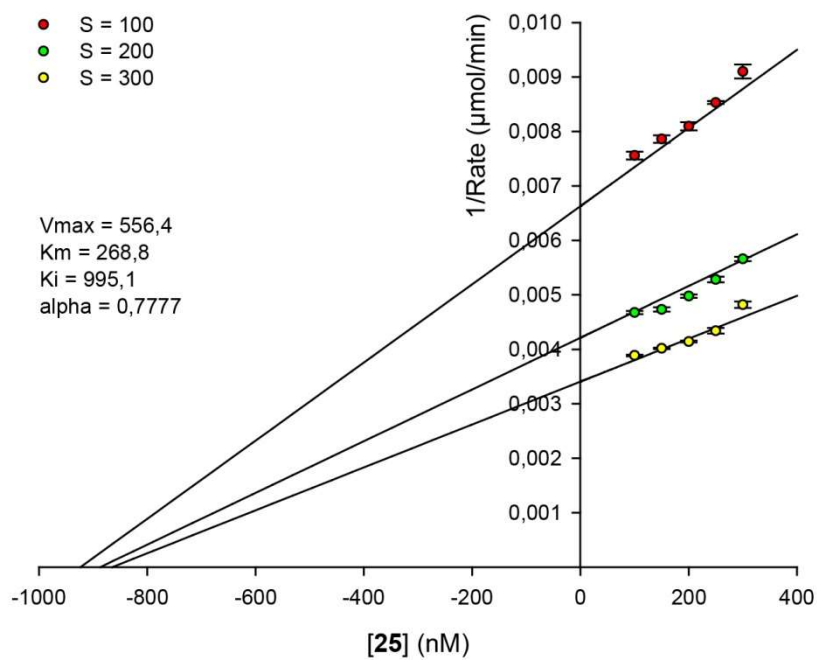

**Figure S5.** Dixon's plot obtained for **25** (100-300 nM), in presence of *EeAChE* (0.0833 U/mL) and ASCh (100-300  $\mu\text{M}$ ). Mixed inhibition mechanism was observed ( $K_i = 0.995 \pm 0.374 \mu\text{M}$ ,  $R^2 = 0.988$ ).

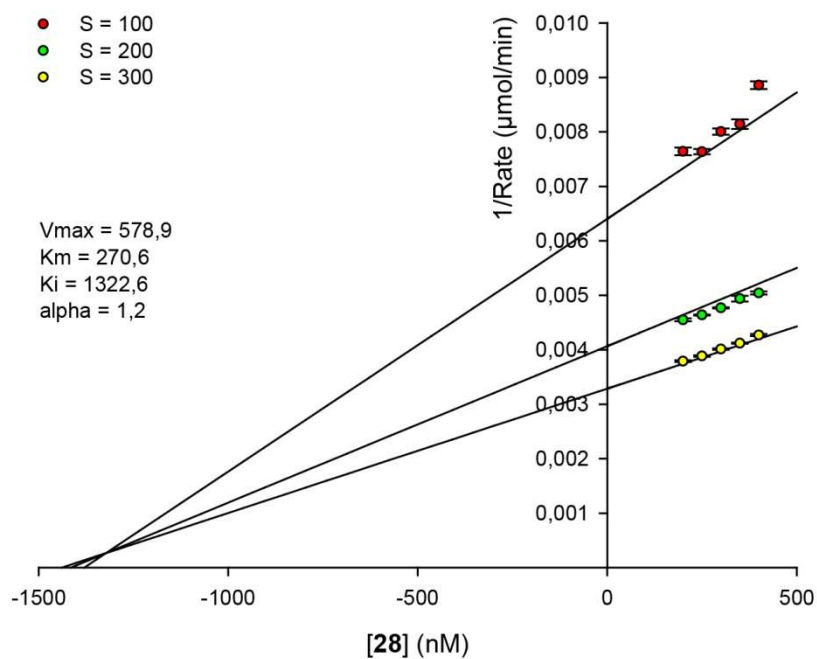

**Figure S6.** Dixon's plot obtained for **28** (200-400 nM), in presence of *EeAChE* (0.0833 U/mL) and ASCh (100-300  $\mu\text{M}$ ). Mixed inhibition mechanism was observed ( $K_i = 1.323 \pm 0.622 \mu\text{M}$ ,  $R^2 = 0.990$ ).

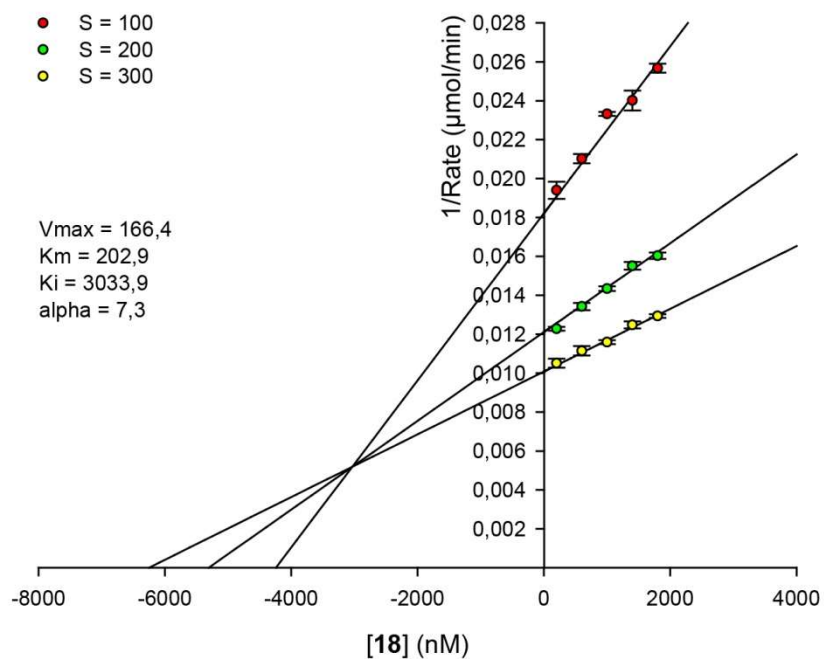

**Figure S7.** Dixon's plot obtained for **18** (200-1800 nM), in presence of *eq*BChE (0.0833 U/mL) and ASCh (100-300  $\mu\text{M}$ ). Mixed inhibition mechanism was observed ( $K_i = 3.034 \pm 0.604 \mu\text{M}$ ,  $R^2 = 0.986$ ).

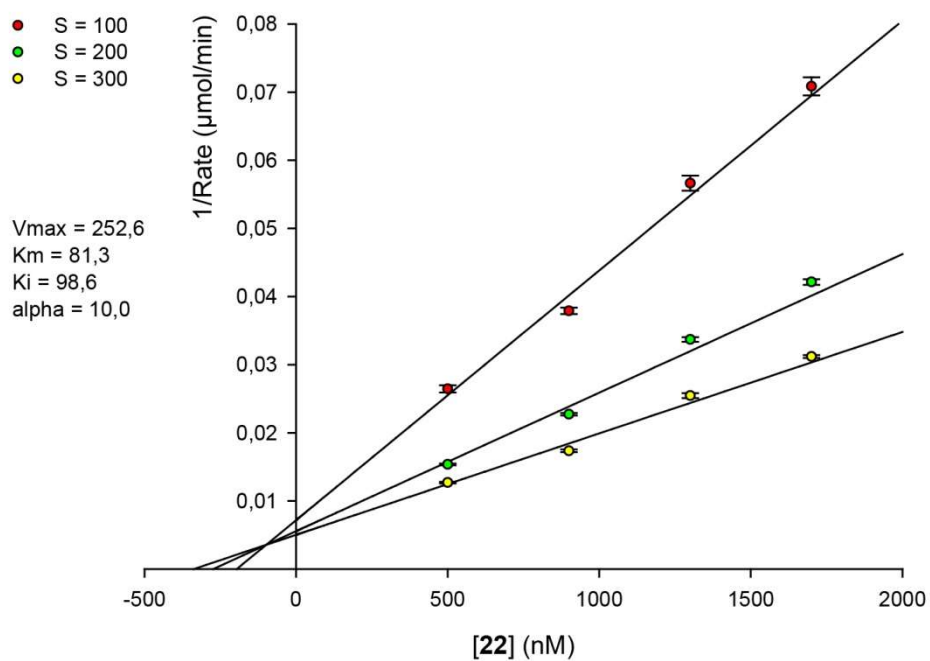

**Figure S8.** Dixon's plot obtained for **22** (500-1700 nM), in presence of *eq*BChE (0.0833 U/mL) and ASCh (100-300  $\mu\text{M}$ ). Mixed inhibition mechanism was observed ( $K_i = 0.099 \pm 0.071 \mu\text{M}$ ,  $R^2 = 0.990$ ).

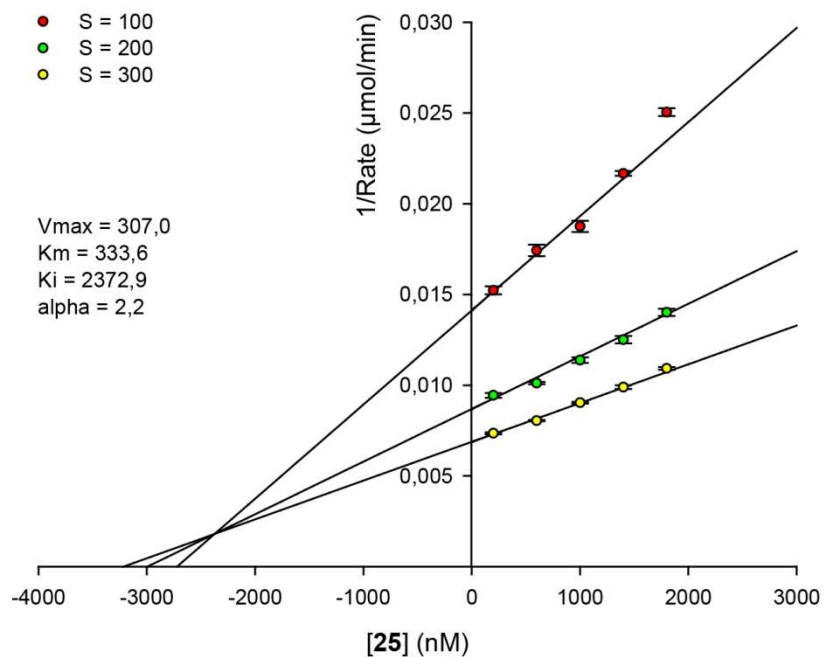

**Figure S9.** Dixon's plot obtained for **25** (200-1800 nM), in presence of *eqBChE* (0.0833 U/mL) and ASCh (100-300  $\mu\text{M}$ ). Mixed inhibition mechanism was observed ( $K_i = 2.373 \pm 0.304 \mu\text{M}$ ,  $R^2 = 0.992$ ).

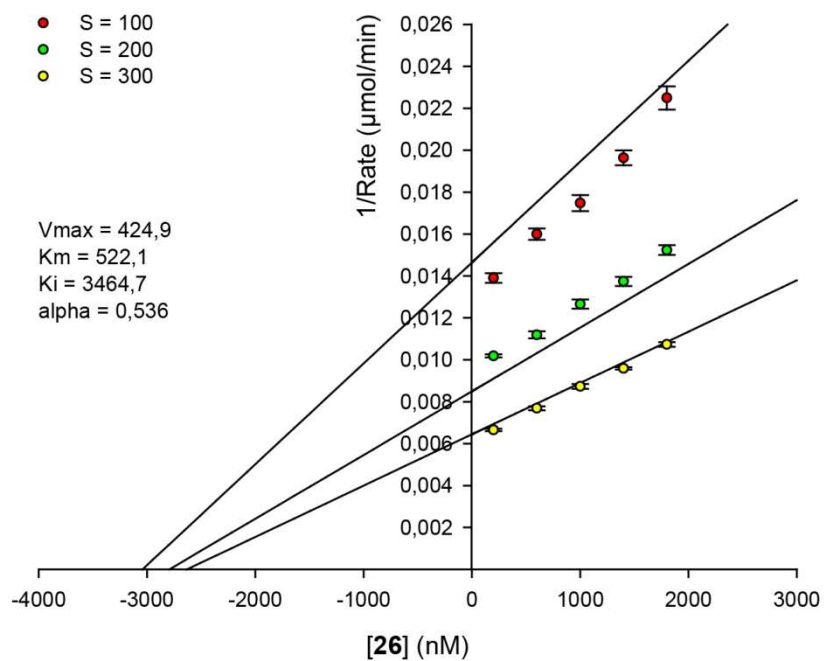

**Figure S10.** Dixon's plot obtained for **26** (200-1800 nM), in presence of *eqBChE* (0.0833 U/mL) and ASCh (100-300  $\mu\text{M}$ ). Mixed inhibition mechanism was observed ( $K_i = 3.465 \pm 1.480 \mu\text{M}$ ,  $R^2 = 0.950$ ).

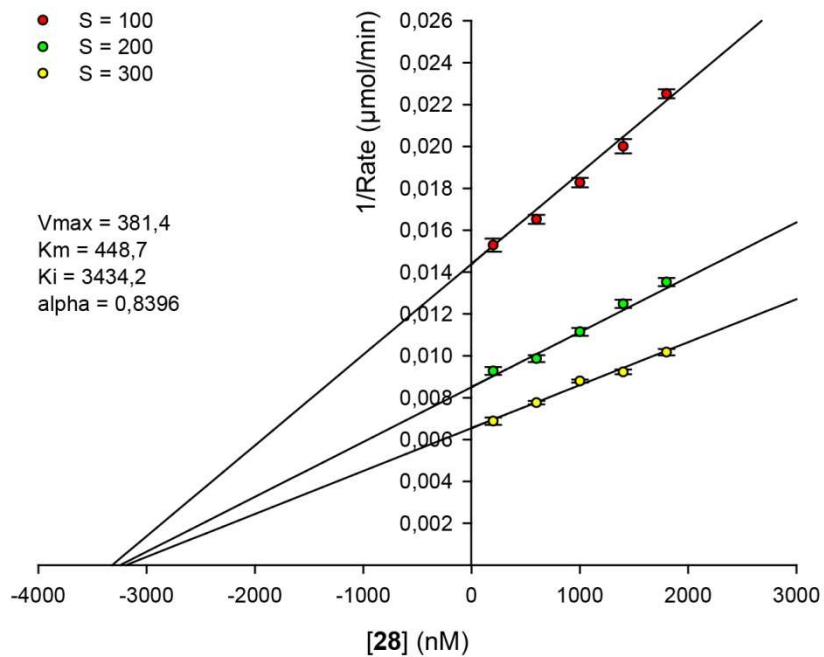

**Figure S11.** Dixon's plot obtained for **28** (200-1800 nM), in presence of *eq*BChE (0.0833 U/mL) and ASCh (100-300  $\mu$ M). Mixed inhibition mechanism was observed ( $K_i = 3.434 \pm 0.701 \mu$ M,  $R^2 = 0.988$ ).

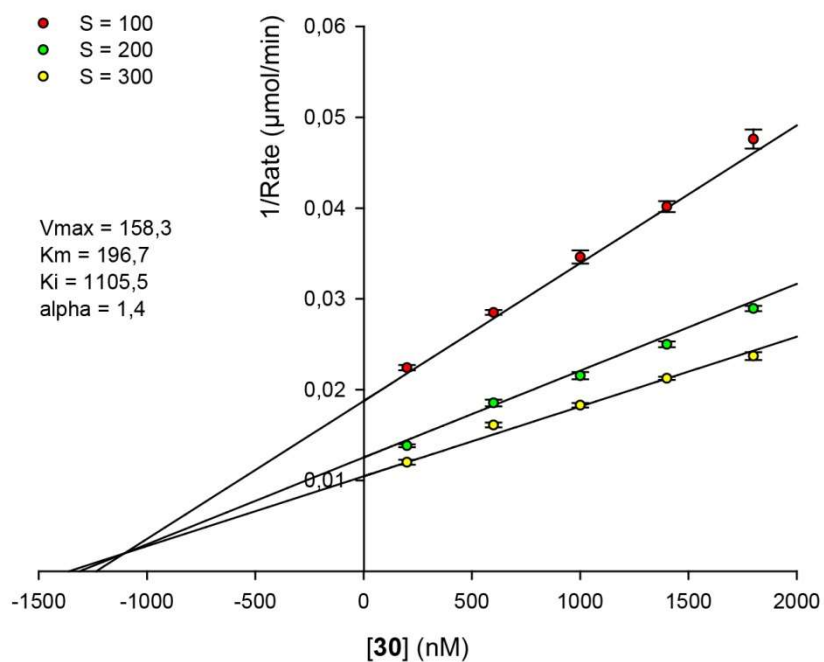

**Figure S12.** Dixon's plot obtained for **30** (200-1800 nM), in presence of *eq*BChE (0.0833 U/mL) and ASCh (100-300  $\mu$ M). Mixed inhibition mechanism was observed ( $K_i = 1.105 \pm 0.189 \mu$ M,  $R^2 = 0.983$ ).



### IC<sub>50</sub> graph of compound **20** towards *EeAChE*

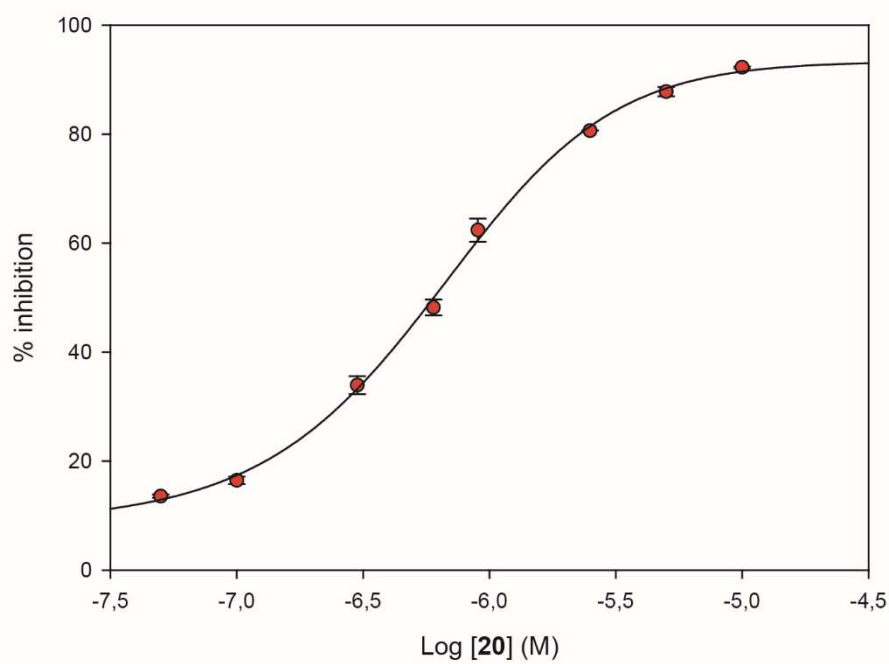

**Figure S13.** IC<sub>50</sub> graph for compound **20** (0.05-10  $\mu$ M), in presence of *EeAChE* (0.0833 U/mL) and ASCh (100  $\mu$ M). The IC<sub>50</sub> value extrapolated from the graph is  $622 \pm 30$  nM.

## Molecular docking studies

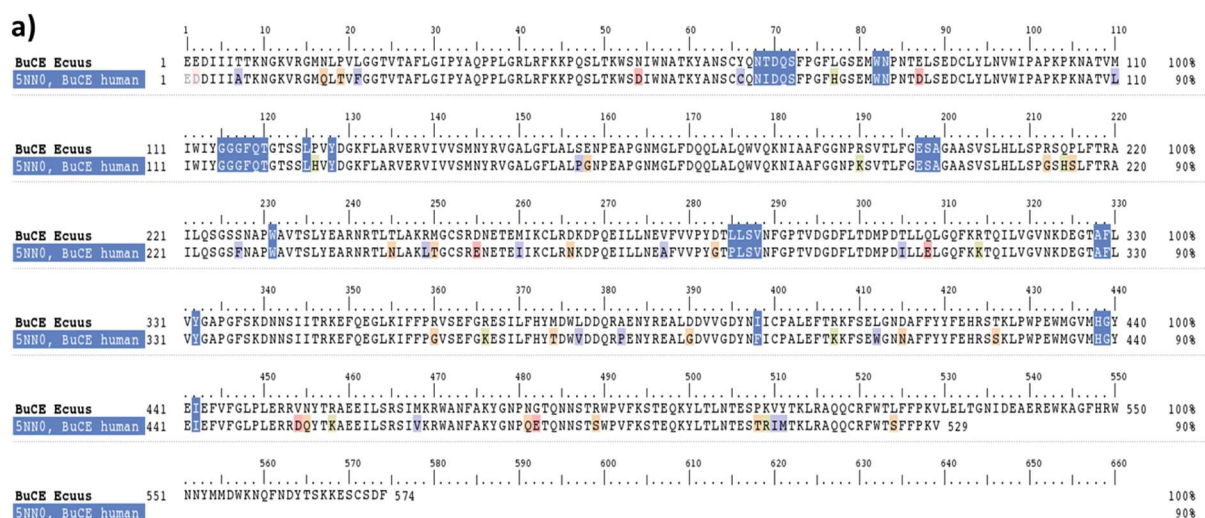

**b)**

| Distance (Å) | Identity (%) | Similarity (%) | Homology (%) |
|--------------|--------------|----------------|--------------|
| 3            | 90           | 90             | 90           |
| 4            | 90           | 90             | 90           |
| 5            | 90           | 90             | 90           |
| 6            | 90           | 90             | 90           |
| 7            | 90           | 90             | 90           |

**Figure S14. a)** Sequence alignment of equine BChE (entry BuCE\_Ecuus, P81908) with human BChE (PDB code: 5NN0) generated by ClustalW algorithm. Among the sequence, only the different residues are coloured. The residues of the binding site are evidenced in blue. **b)** The percentage identity, similarity and homology of the aligned sequences to the selected model within a range of distances from the binding site are reported.

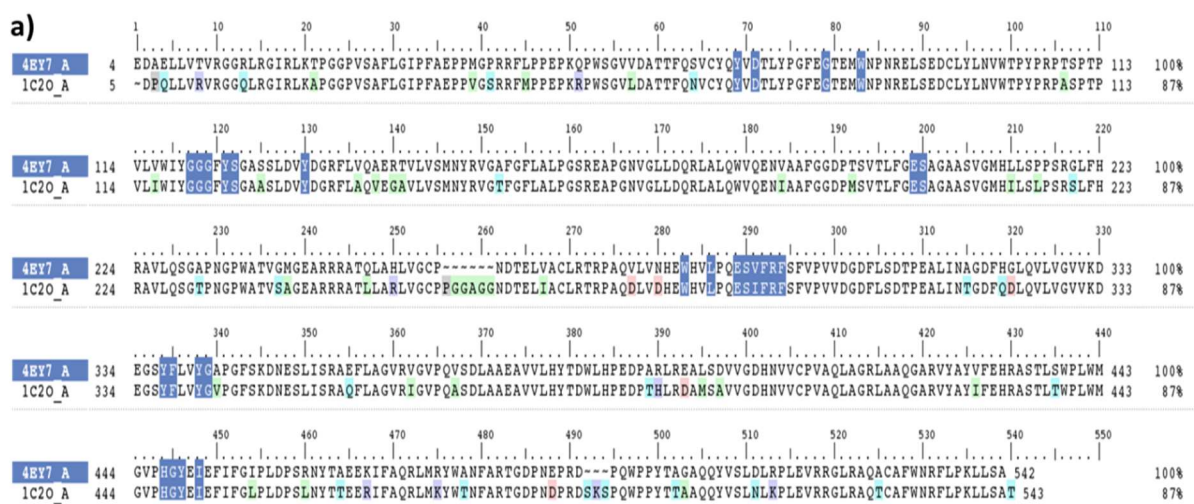

**b)**

| Distance (Å) | Identity (%) | Similarity (%) | Homology (%) |
|--------------|--------------|----------------|--------------|
| 3            | 96.4         | 100            | 100          |
| 4            | 96.4         | 98.2           | 100          |
| 5            | 95.2         | 98.4           | 100          |
| 6            | 96.1         | 98.7           | 100          |
| 7            | 94.7         | 98.9           | 98.9         |

**Figure S15. a)** Sequence alignment of *Electrophorus electricus* AChE (PDB code: 1C2O) with human AChE (PDB code: 4EY7) generated by ClustalW algorithm. Among the sequence, only the different residues are coloured. The residues of the binding site are evidenced in blue. **b)** The percentage identity, similarity and homology of the aligned sequences to the selected model within a range of distances from the binding site are reported.

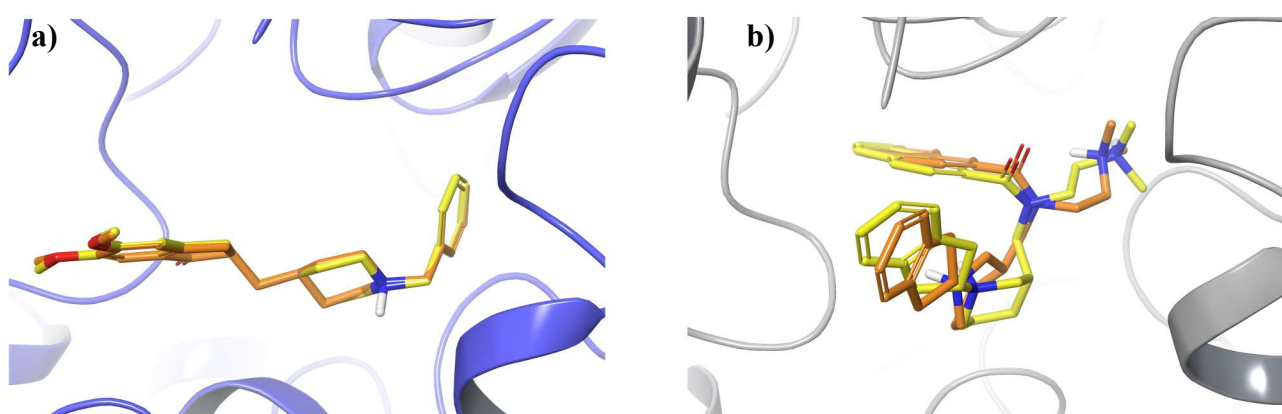

**Figure S16.** Superimposition of the re-docked (yellow carbons) and co-crystallized (orange carbons) ligand binding modes, into **a)** *hAChE* and **b)** *hBChE* active sites. RMSD was found to be 0.12 Å for *hAChE* ligand and 0.96 Å for *hBChE* ligand.

**Table S1.** Glide Score values (kcal/mol) of compounds **9-33** for binding *hAChE* and *hBChE* and re-docking values of co-crystallized ligands of 4EY7 and 5NN0 PDB structures.

| <b>Compound</b>   | <b>Glide Score</b> |              |
|-------------------|--------------------|--------------|
|                   | <i>hAChE</i>       | <i>hBChE</i> |
| <b>9</b>          | -7.81              | -5.59        |
| <b>10</b>         | -9.63              | -8.44        |
| <b>11</b>         | -9.35              | -7.90        |
| <b>12</b>         | -10.47             | -8.21        |
| <b>13</b>         | -7.05              | -5.67        |
| <b>14</b>         | -10.12             | -8.12        |
| <b>15</b>         | -10.24             | -8.20        |
| <b>16</b>         | -9.57              | -7.13        |
| <b>17</b>         | -9.83              | -6.85        |
| <b>18</b>         | -11.60             | -7.67        |
| <b>19</b>         | -10.55             | -7.21        |
| <b>20</b>         | -11.33             | -7.31        |
| <b>21</b>         | -10.40             | -6.52        |
| <b>22</b>         | -10.91             | -8.04        |
| <b>23</b>         | -7.78              | -5.13        |
| <b>24</b>         | -9.41              | -6.89        |
| <b>25</b>         | -7.30              | -5.51        |
| <b>26</b>         | -10.66             | -8.19        |
| <b>27</b>         | -10.37             | -8.31        |
| <b>28</b>         | -9.64              | -7.46        |
| <b>29</b>         | -10.70             | -6.90        |
| <b>30</b>         | -11.18             | -7.90        |
| <b>31</b>         | -10.52             | -7.61        |
| <b>32</b>         | -10.96             | -7.02        |
| <b>33</b>         | -9.82              | -7.39        |
| 4EY7 x-ray ligand | -12.70             | -            |
| 5NN0 x-ray ligand | -                  | -9.96        |

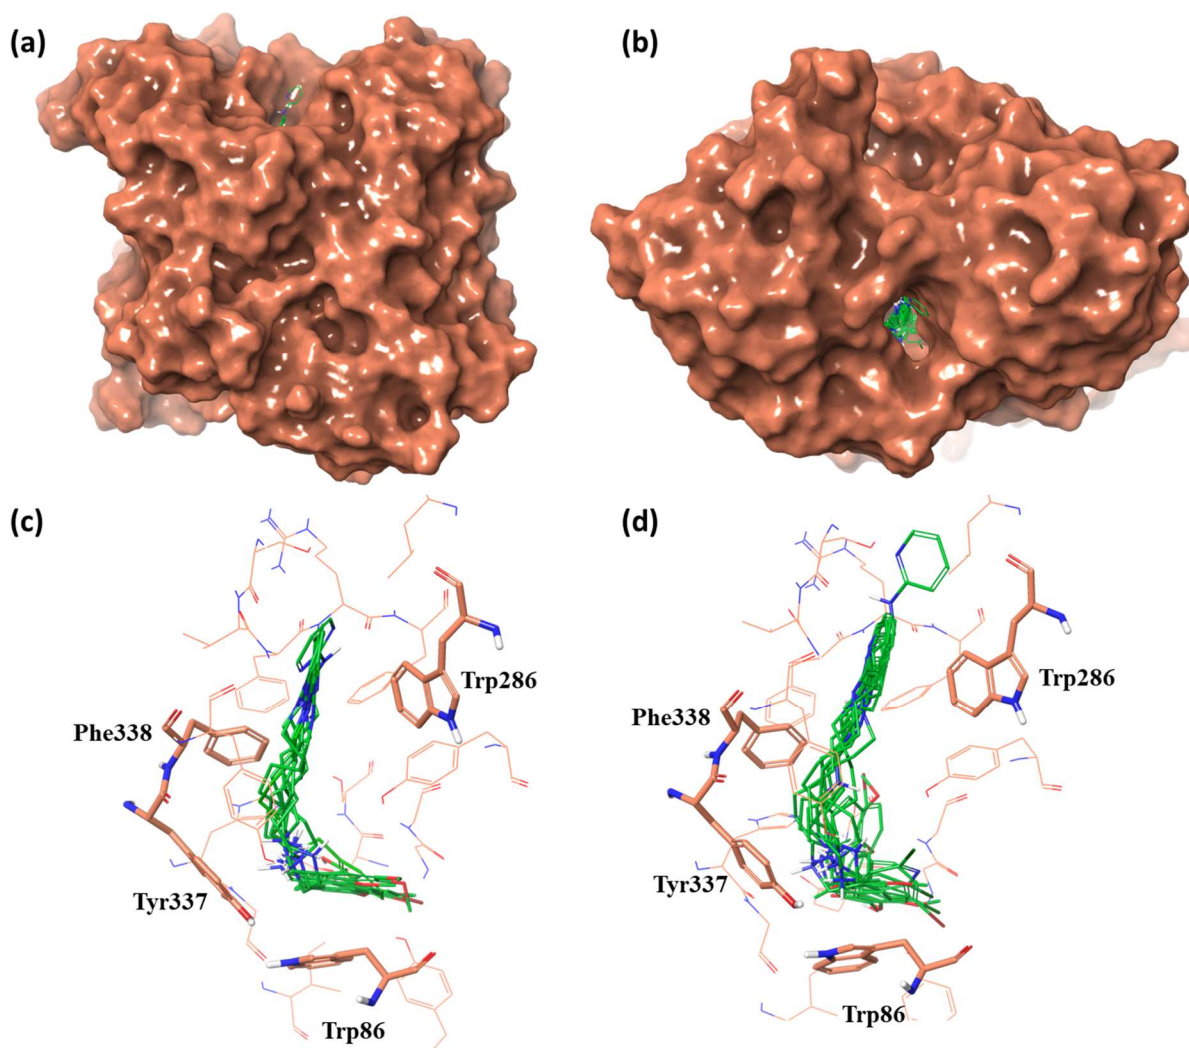

**Figure S17.** **a)** Front view and **b)** top view of the best docked poses of compounds **9-33** and donepezil into *hAChE*. Overlay of donepezil and the best docked poses of **c)** pyrimidine and **d)** pyridine derivatives (green carbon sticks) in the active site of *hAChE*. Trp86 (CAS site), Trp286 (PAS site), Tyr337 and Phe338 (mid-gorge region) residues of the *hAChE* pocket were shown as salmon carbon sticks in the receptor.

## UV-Vis titrations spectra and Job's plots for selected compounds

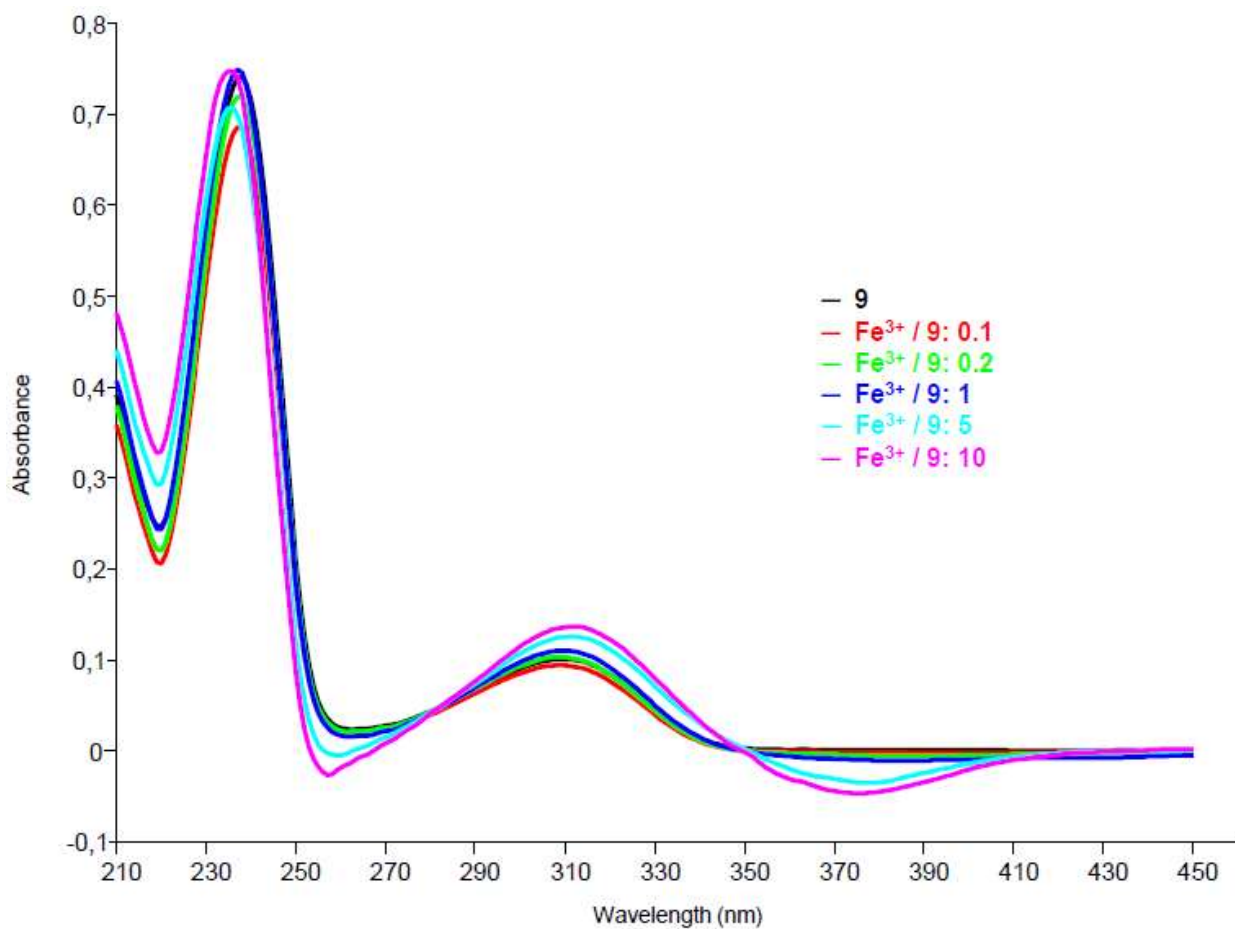

**Figure S18.** UV-Vis titration of ligand **9** with Fe<sup>3+</sup>. The greatest variations in spectra with increasing amount of metal are observed at 220 and 312 nm, with an increase of absorbance, and at 256 and 372 nm, with a reduction of absorbance. There are two isosbestic points at 281 and 349 nm.

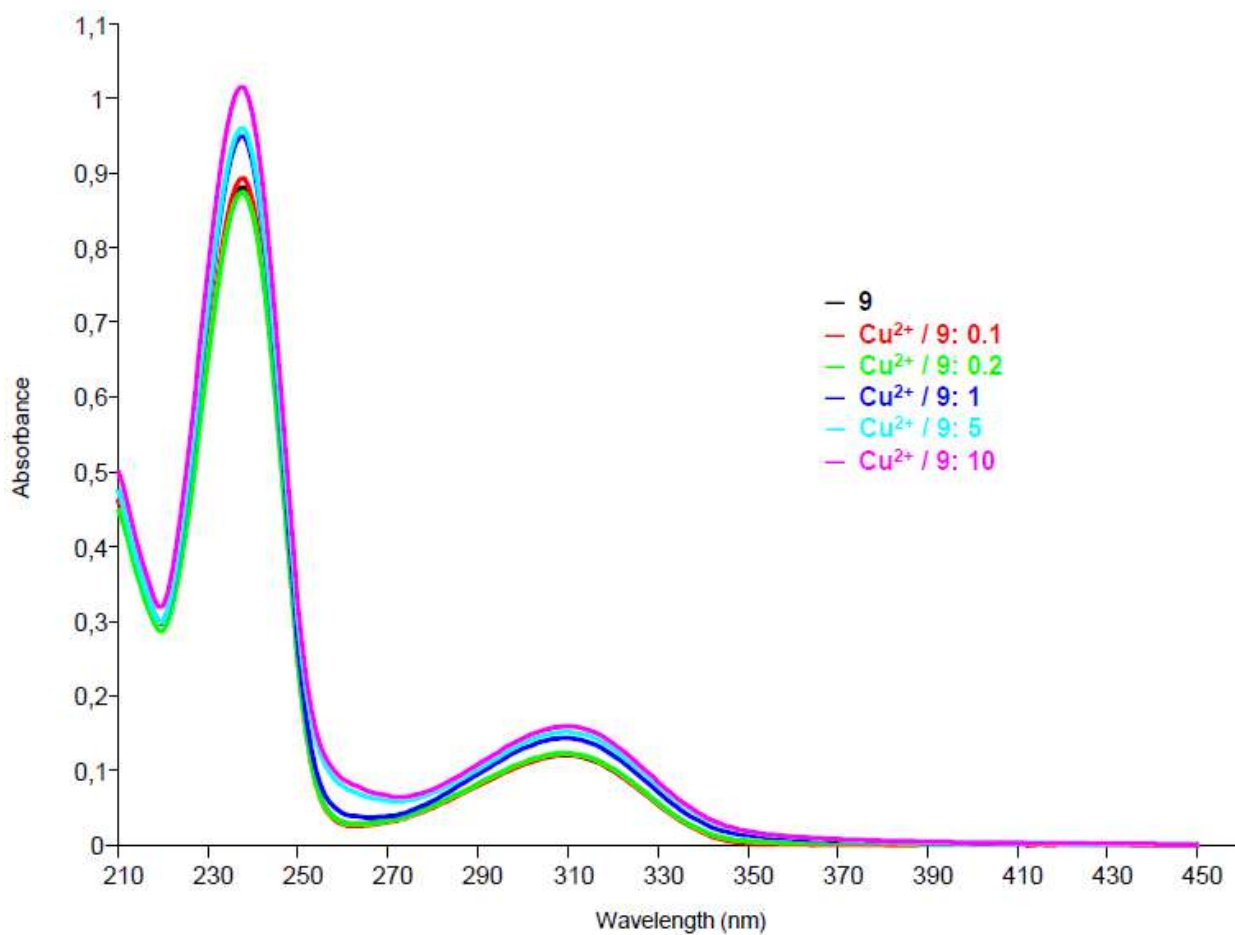

**Figure S19.** UV-Vis titration of ligand **9** with Cu<sup>2+</sup>. The greatest variations in spectra with increasing amount of metal are observed at 237, 260 and 310 nm, with an increase of absorbance.

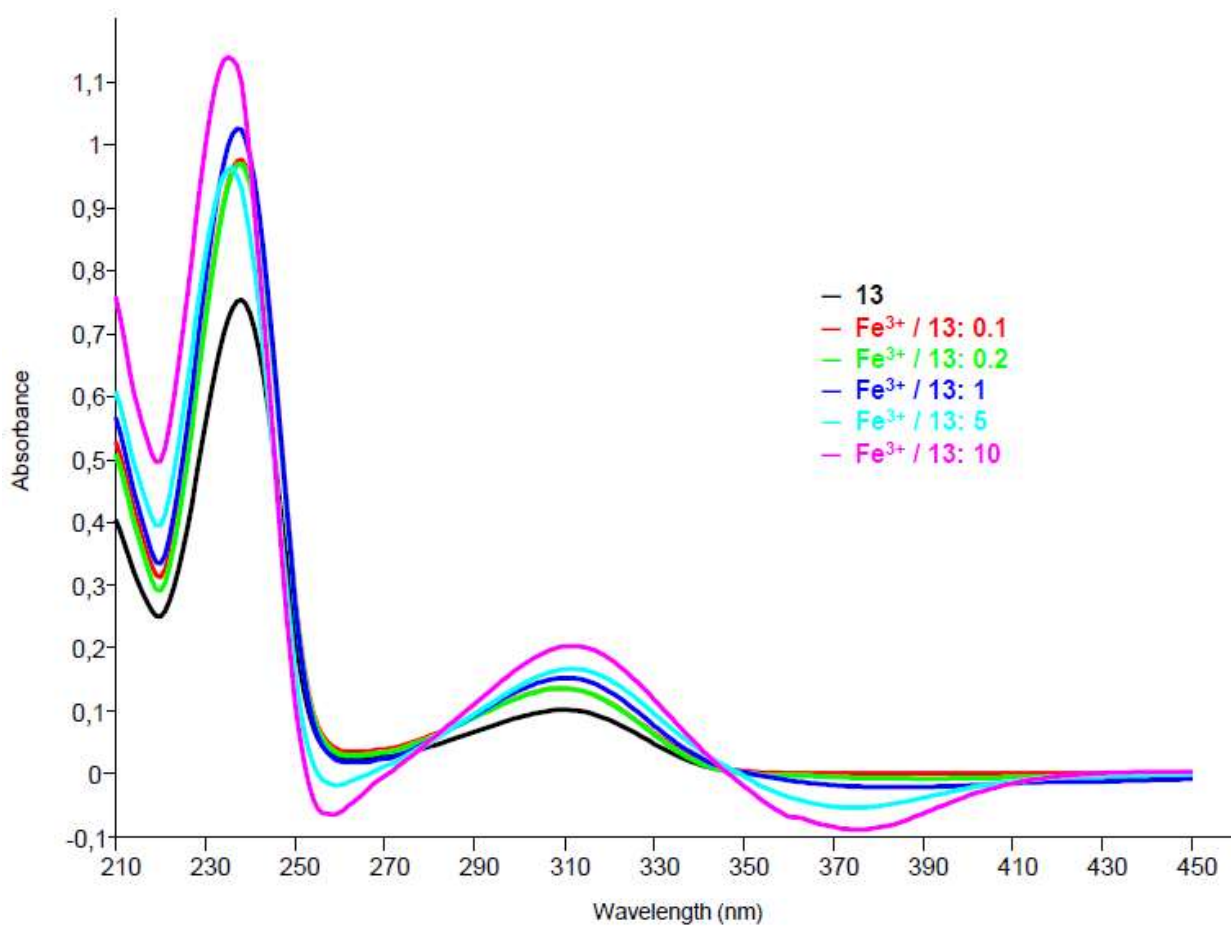

**Figure S20.** UV-Vis titration of ligand **13** with Fe<sup>3+</sup>. The greatest variations in spectra with increasing amount of metal are observed at 220 and 312 nm, with an increase of absorbance, and at 256 and 372 nm, with a reduction of absorbance. There are two isosbestic points at 278 and 345 nm.



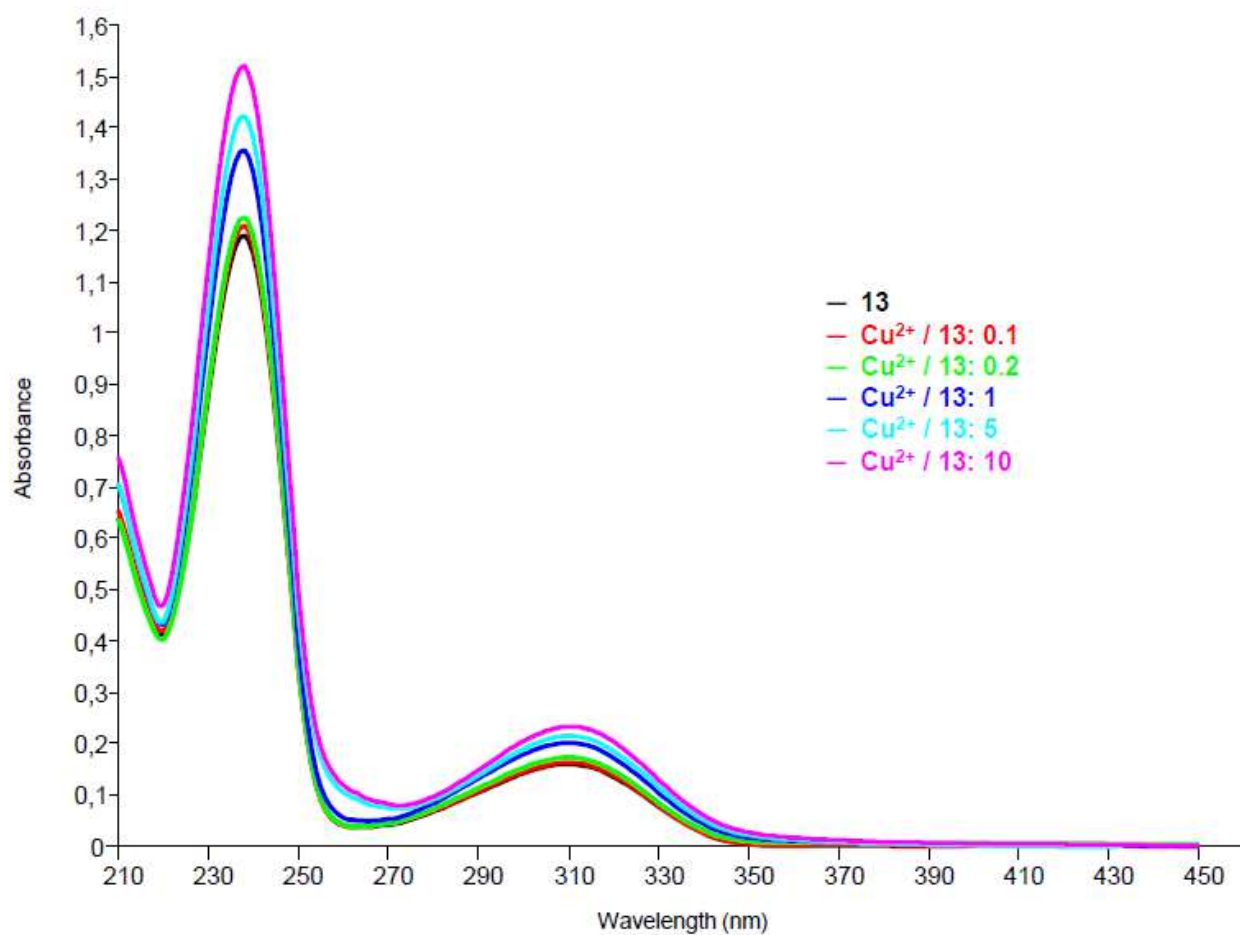

**Figure S21.** UV-Vis titration of ligand **13** with Cu<sup>2+</sup>. The greatest variations in spectra with increasing amount of metal are observed at 238, 259 and 310 nm, with an increase of absorbance.

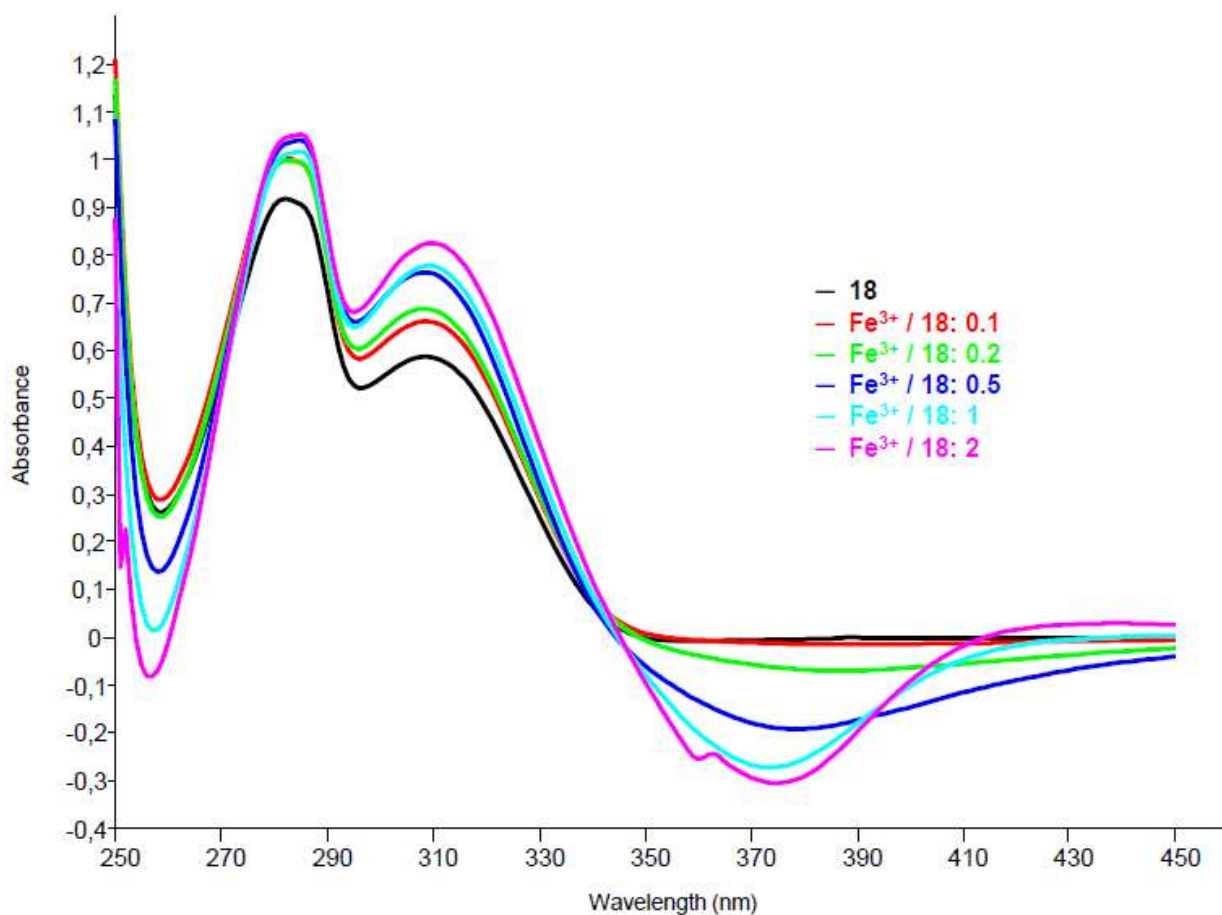

**Figure S22.** UV-Vis titration of ligand **18** with  $\text{Fe}^{3+}$ . The greatest variations in spectra with increasing amount of metal are observed at 258 and 375 nm, with a reduction of absorbance, and at 280 and 309 nm, with an increase of absorbance. There are two isosbestic points at 273 and 343 nm.

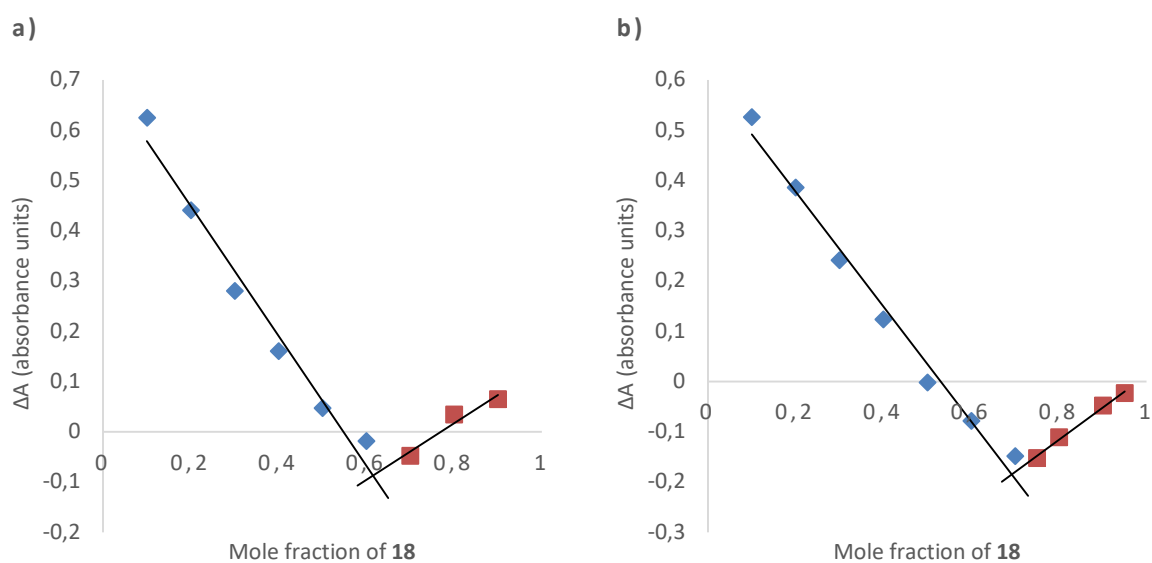

**Figure S23.** Job's plot of compound **18** in presence of  $\text{Fe}^{3+}$ : variation of the absorbance ( $\Delta A$ ) at the wavelength of 258 nm in **a)** or 375 nm in **b)**, in ordinate, versus the mole fraction of **18**, in abscissa. X (mole fraction that causes the maximum variation of absorbance) = 0.69; n (number of ligand molecules per cation) = 2.

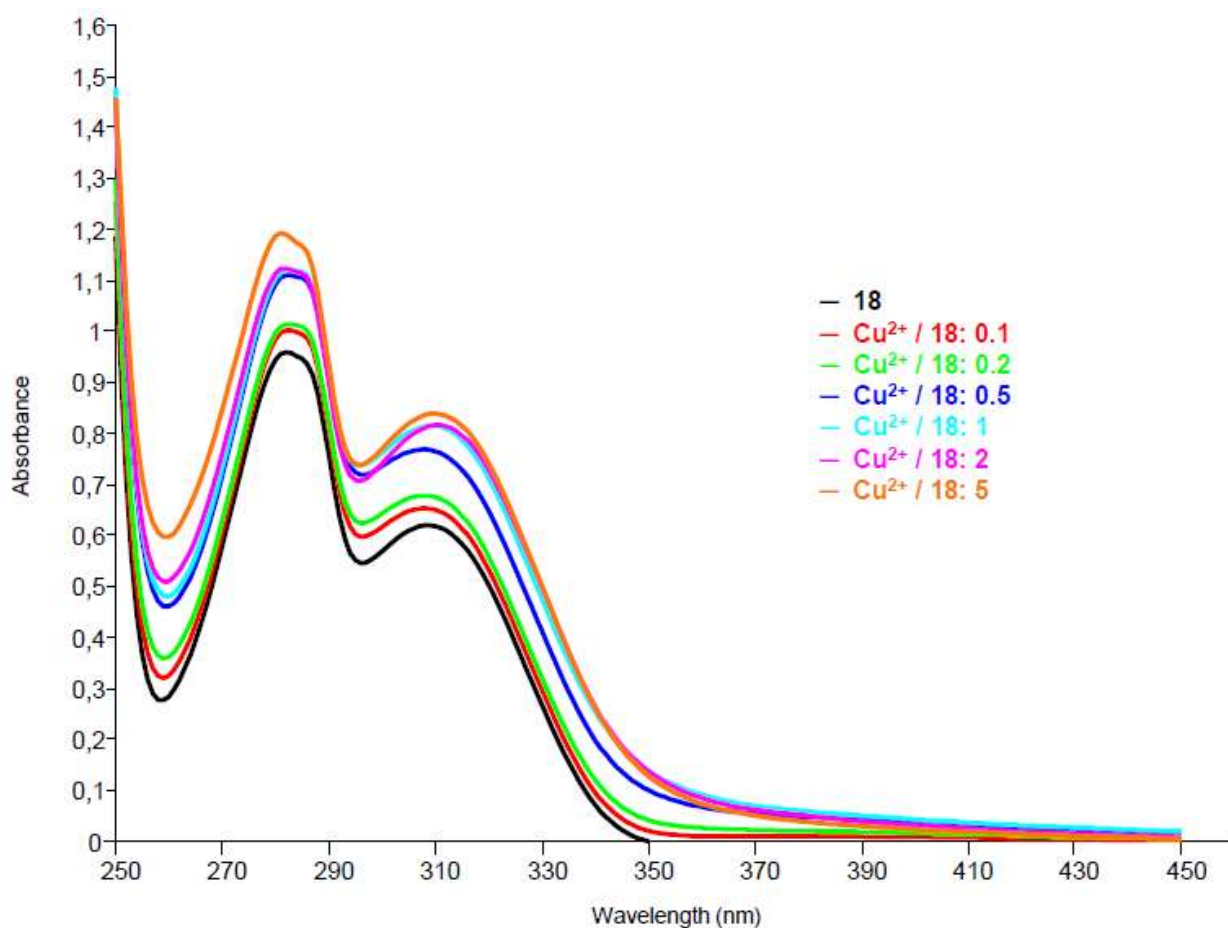

**Figure S24.** UV-Vis titration of ligand **18** with  $\text{Cu}^{2+}$ . The greatest variations in spectra with increasing amount of metal are observed at 258, 283 and 309 nm, with an increase of absorbance.

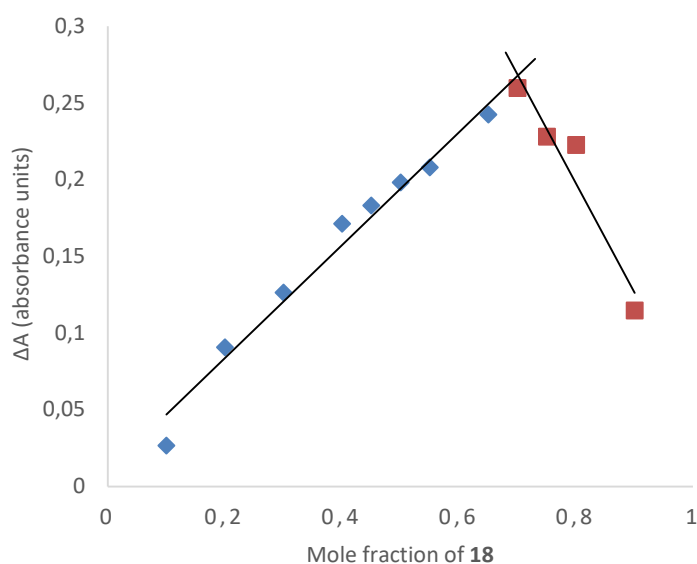

**Figure S25.** Job's plot of compound **18** in presence of  $\text{Cu}^{2+}$ : variation of the absorbance ( $\Delta A$ ) at the wavelength of 330 nm, in ordinate, versus the mole fraction of **18**, in abscissa. X (mole fraction that causes the maximum variation of absorbance) = 0.70; n (number of ligand molecules per cation) = 2.

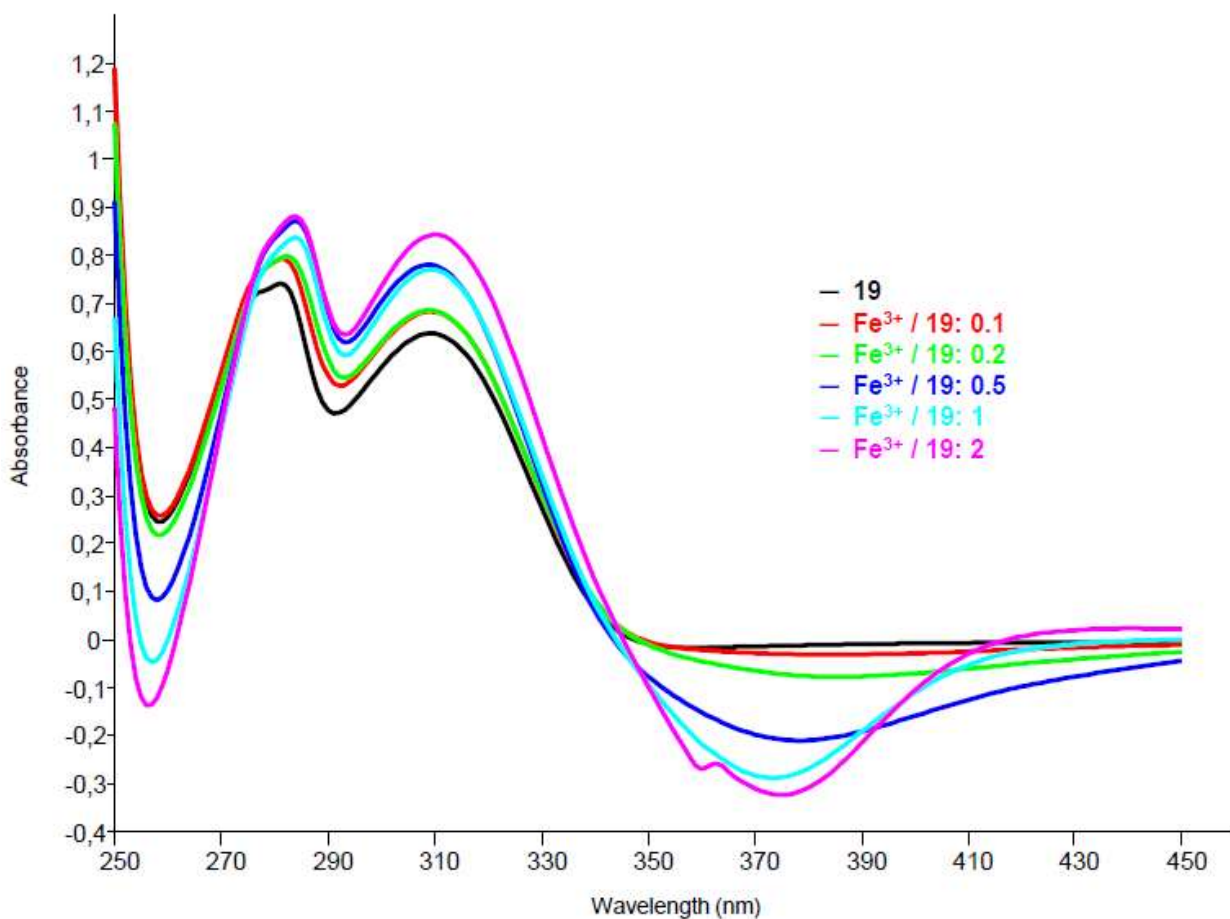

**Figure S26.** UV-Vis titration of ligand **19** with  $\text{Fe}^{3+}$ . The greatest variations in spectra with increasing amount of metal are observed at 259 and 375 nm, with a reduction of absorbance, and at 284 and 312 nm, with an increase of absorbance. There are two isosbestic points at 275 and 343 nm.

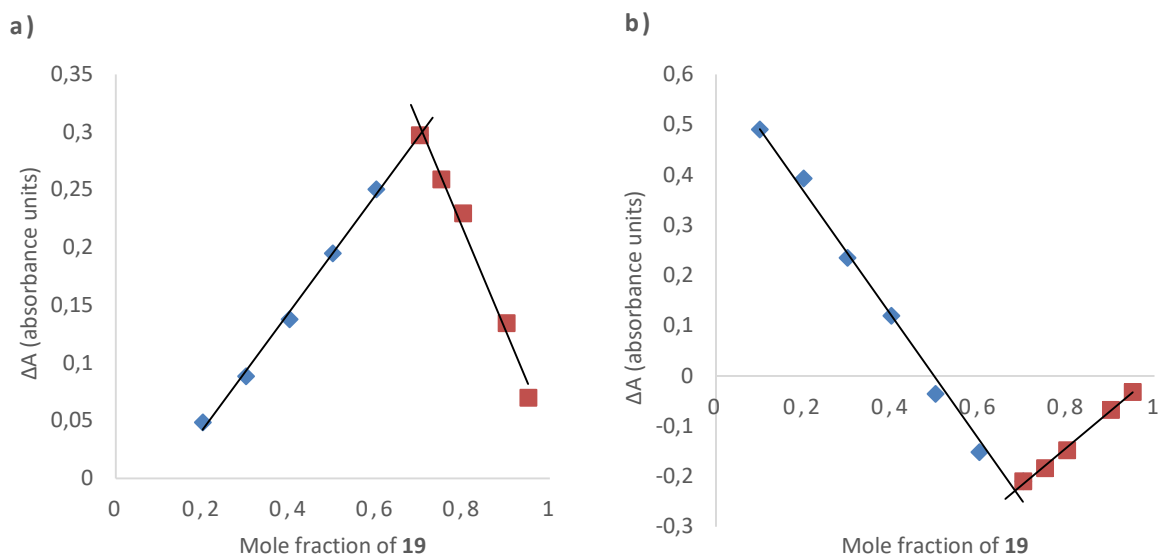

**Figure S27.** Job's plot of compound **19** in presence of  $\text{Fe}^{3+}$ : variation of the absorbance ( $\Delta A$ ) at the wavelength of 292 nm in **a)** or at 375 nm in **b)**, in ordinate, versus the mole fraction of **19**, in abscissa. X (mole fraction that causes the maximum variation of absorbance) = 0.71 in **a)**, 0.68 in **b)**; n (number of ligand molecules per cation) = 2.

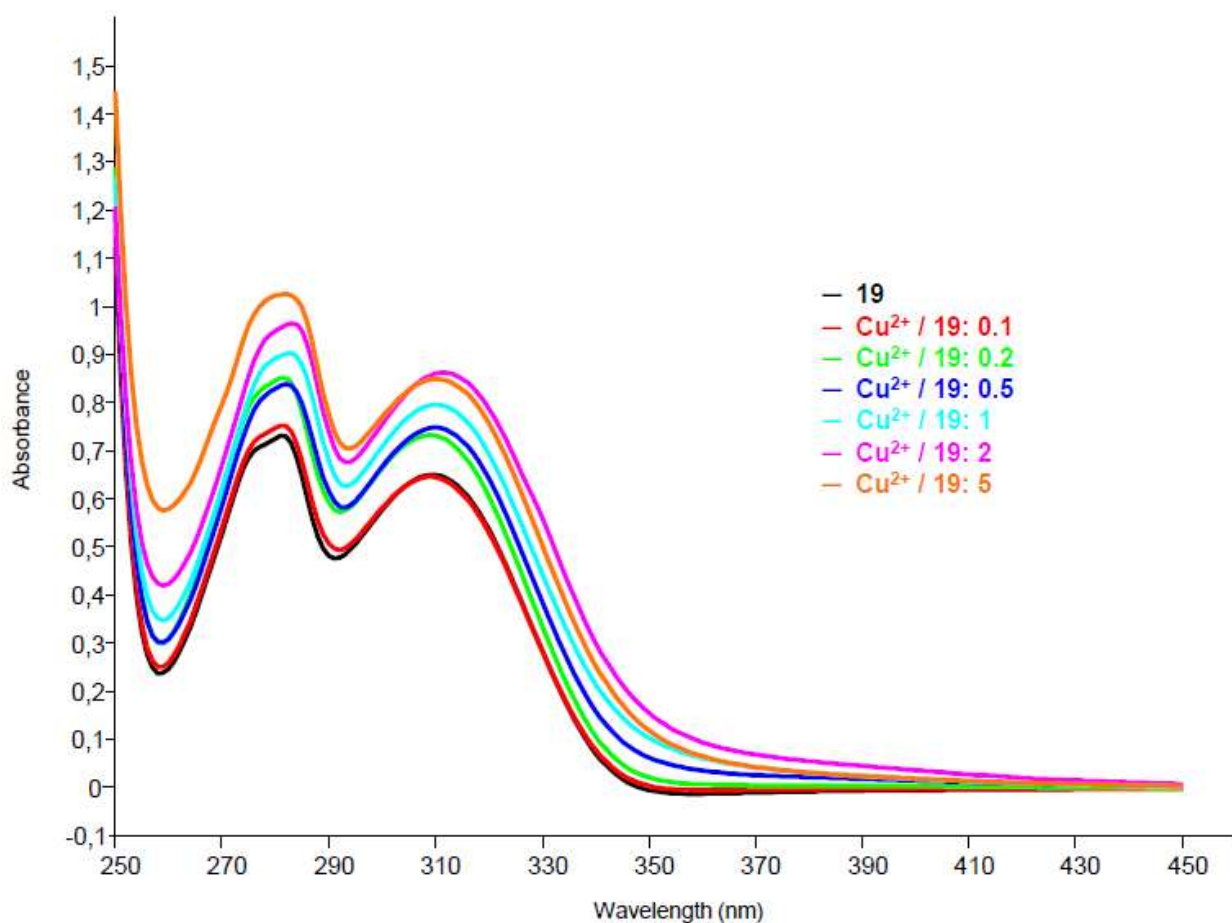

**Figure S28.** UV-Vis titration of ligand **19** with  $\text{Cu}^{2+}$ . The greatest variations in spectra with increasing amount of metal are observed at 259, 280 and 312 nm, with an increase of absorbance.

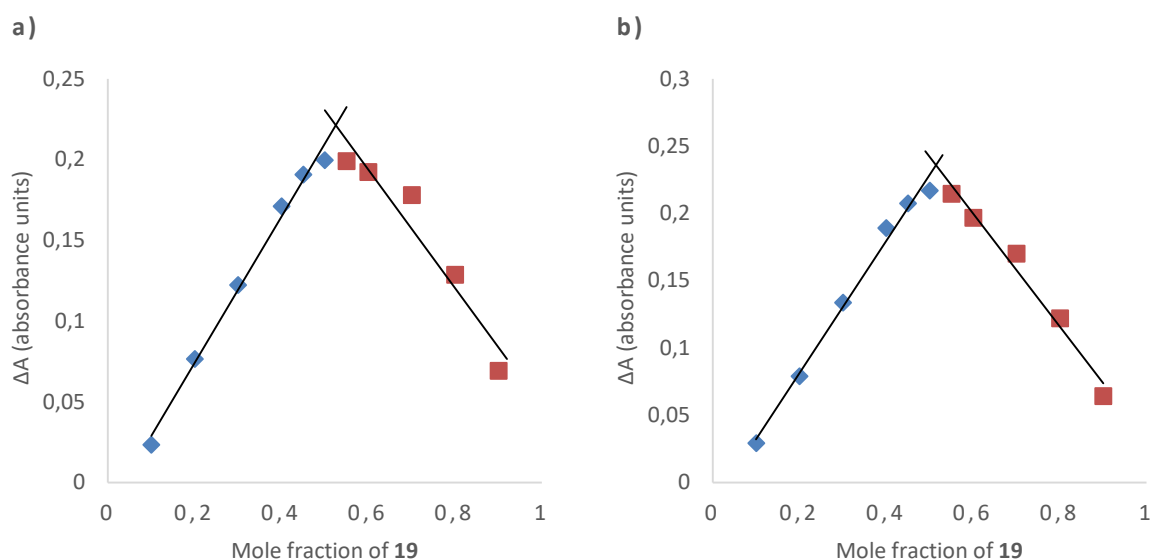

**Figure S29.** Job's plot of compound **19** in presence of  $\text{Cu}^{2+}$ : variation of the absorbance ( $\Delta A$ ) at the wavelength of 312 nm in **a)** or at 330 nm in **b)**, in ordinate, versus the mole fraction of **19**, in abscissa. X (mole fraction that causes the maximum variation of absorbance) = 0.53 in **a)**, 0.51 in **b)**; n (number of ligand molecules per cation) = 1.

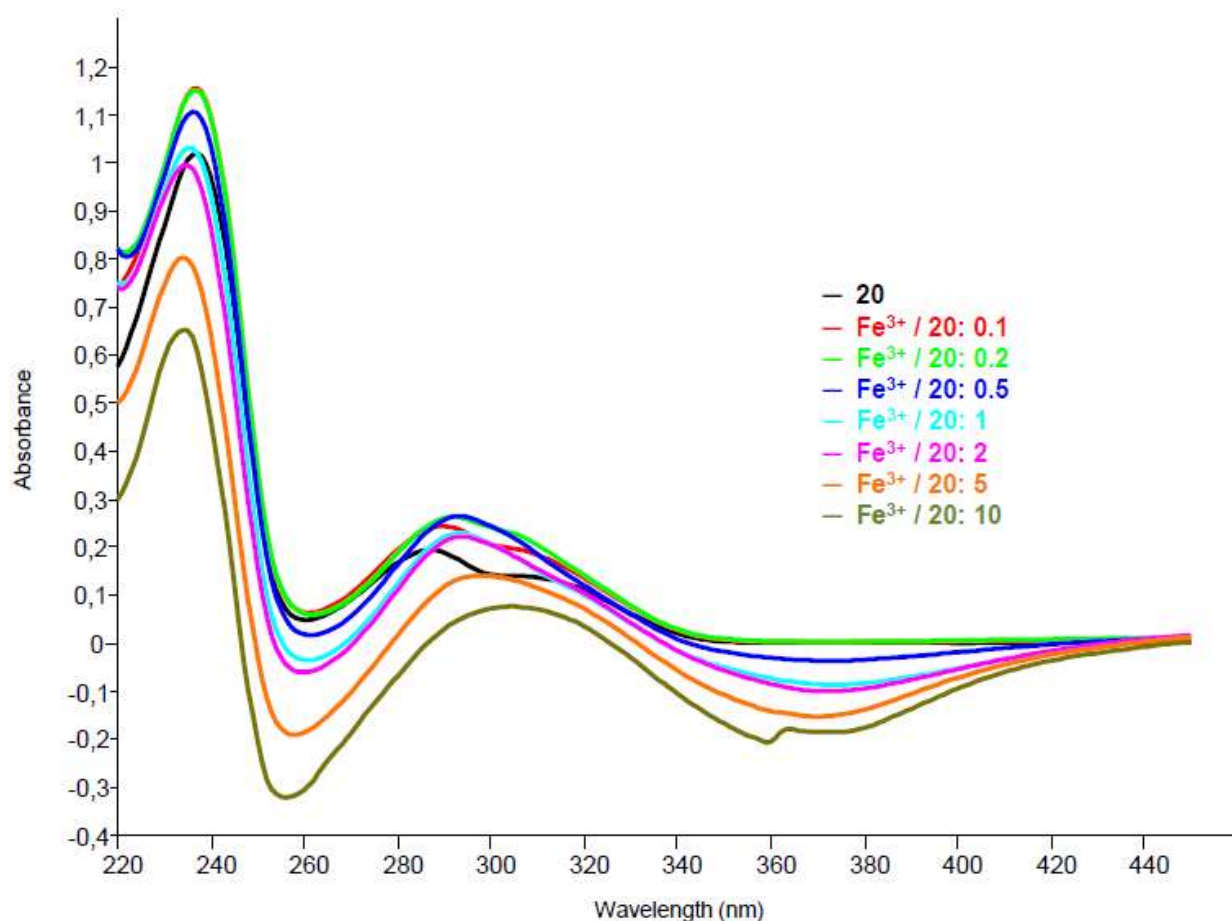

**Figure S30.** UV-Vis titration of ligand **20** with  $\text{Fe}^{3+}$ . The greatest variations in spectra with increasing amount of metal are observed at 256 and 370 nm, with a regular reduction of absorbance, at 234 nm and between 270-330 nm.

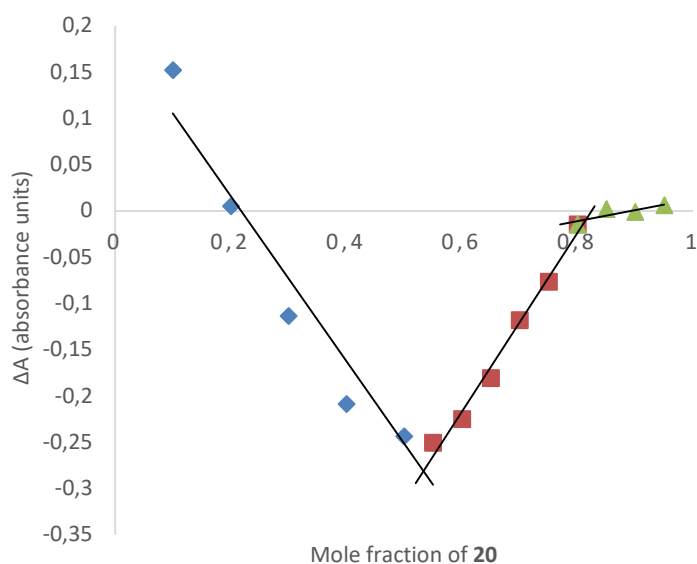

**Figure S31.** Job's plot of compound **20** in presence of  $\text{Fe}^{3+}$ : variation of the absorbance ( $\Delta A$ ) at the wavelength of 370 nm, in ordinate, versus the mole fraction of **20**, in abscissa.  $X_1$  (mole fraction that causes the maximum variation of absorbance) = 0.53;  $X_2 = 0.80$ ;  $n_1$  (number of ligand molecules per cation) = 1;  $n_2 = 4$ .

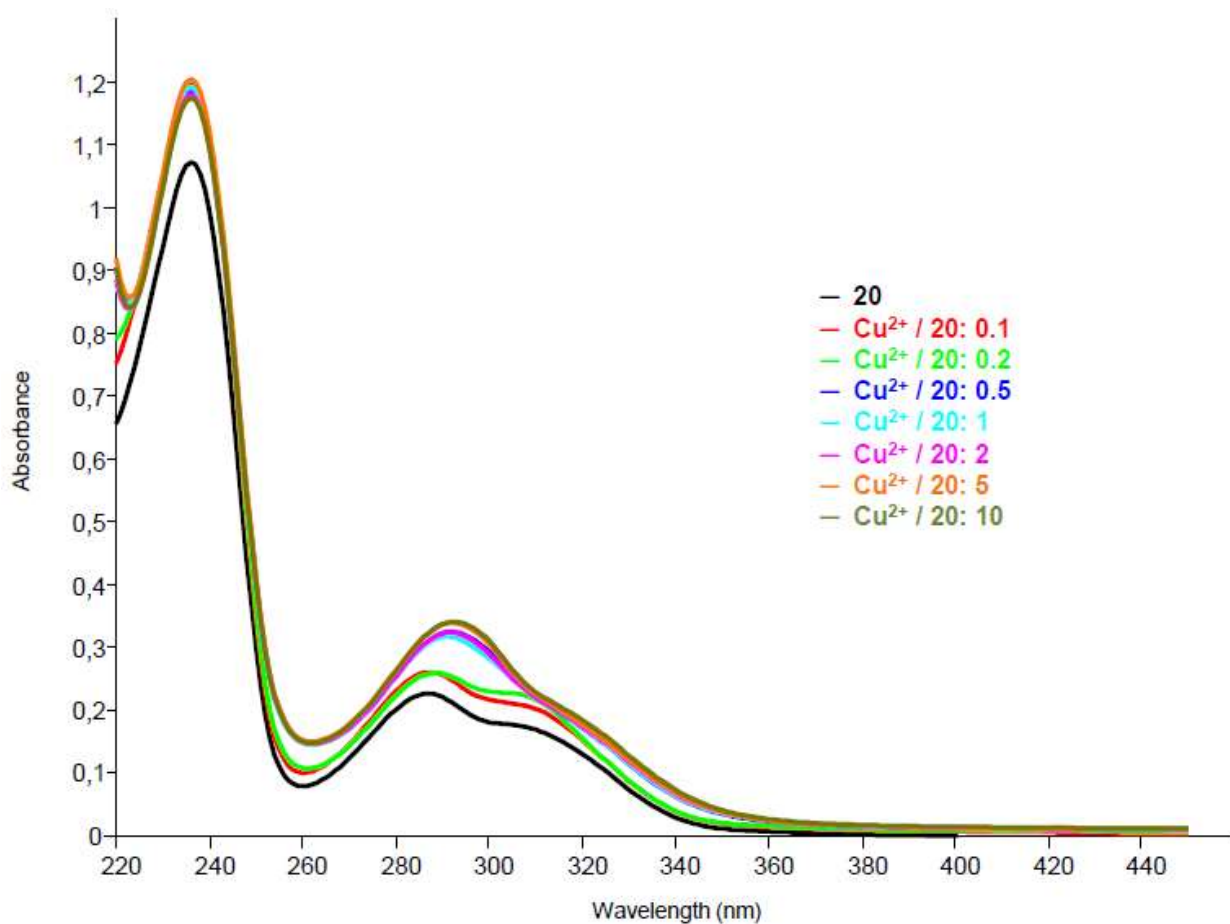

**Figure S32.** UV-Vis titration of ligand **20** with  $\text{Cu}^{2+}$ . The greatest variations in spectra with increasing amount of metal are observed at 260, 294 and 308 nm, with an increase of absorbance.

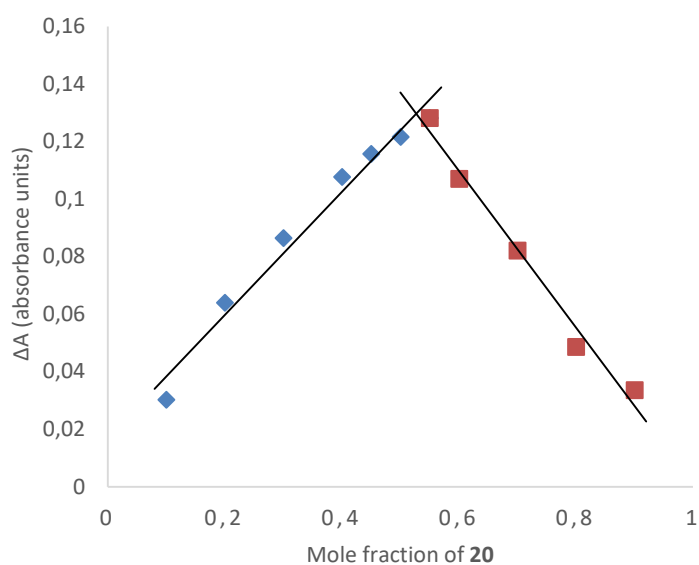

**Figure S33.** Job's plot of compound **20** in presence of  $\text{Cu}^{2+}$ : variation of the absorbance ( $\Delta A$ ) at the wavelength of 330 nm, in ordinate, versus the mole fraction of **20**, in abscissa. X (mole fraction that causes the maximum variation of absorbance) = 0.53; n (number of ligand molecules per cation) = 1.

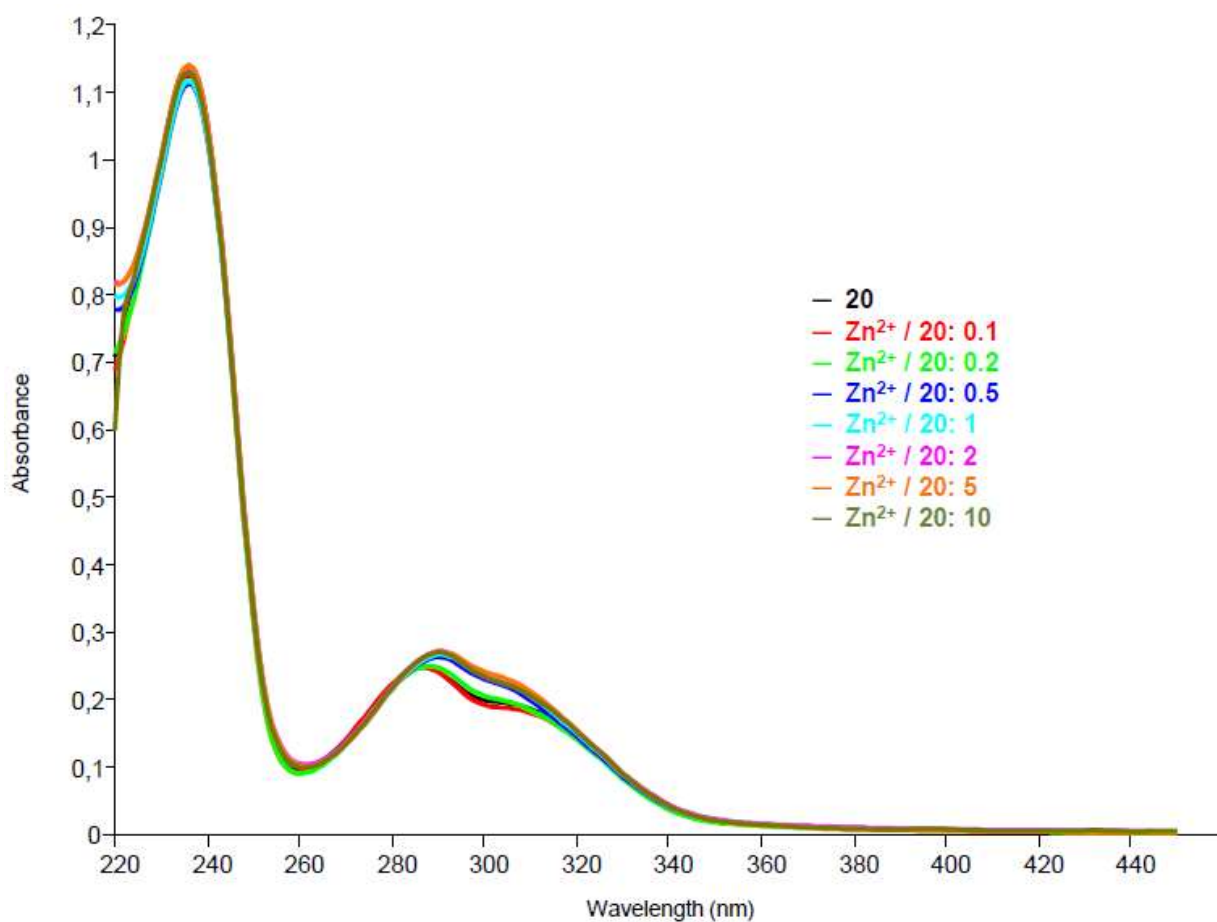

**Figure S34.** UV-Vis titration of ligand **20** with  $Zn^{2+}$ . The variations in spectra with increasing amount of metal are observed only between 285-314 nm, with an increase of absorbance.



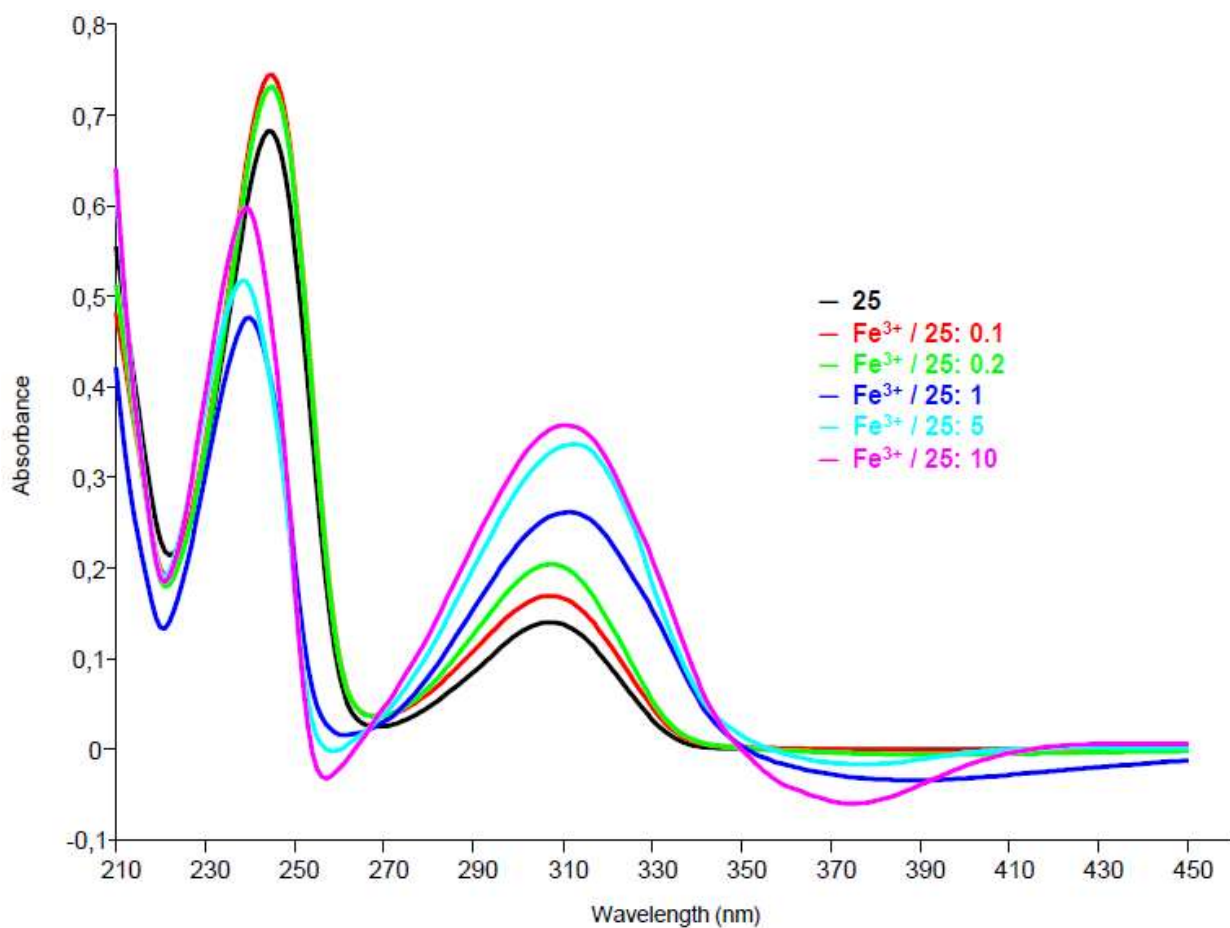

**Figure S35.** UV-Vis titration of ligand **25** with  $\text{Fe}^{3+}$ . The greatest variations in spectra with increasing amount of metal are observed at 251 and 374 nm, with a reduction of absorbance, and at 318 nm, with an increase of absorbance. There are two isosbestic points at 270 and 350 nm.

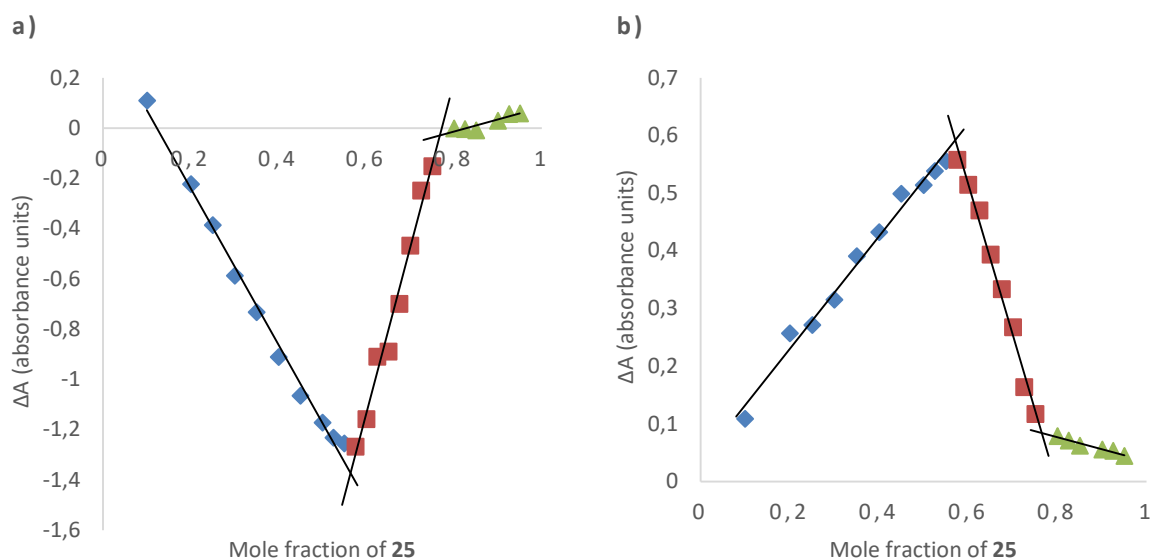

**Figure S36.** Job's plot of compound **25** in presence of  $\text{Fe}^{3+}$ : variation of the absorbance ( $\Delta A$ ) at the wavelength of 251 nm in **a)** or at 318 nm in **b)**, in ordinate, versus the mole fraction of **25**, in abscissa.  $X_1$  (mole fraction that causes the maximum variation of absorbance) = 0.57;  $X_2 = 0.77$ ;  $n_1$  (number of ligand molecules per cation) = 1;  $n_2 = 3$ .

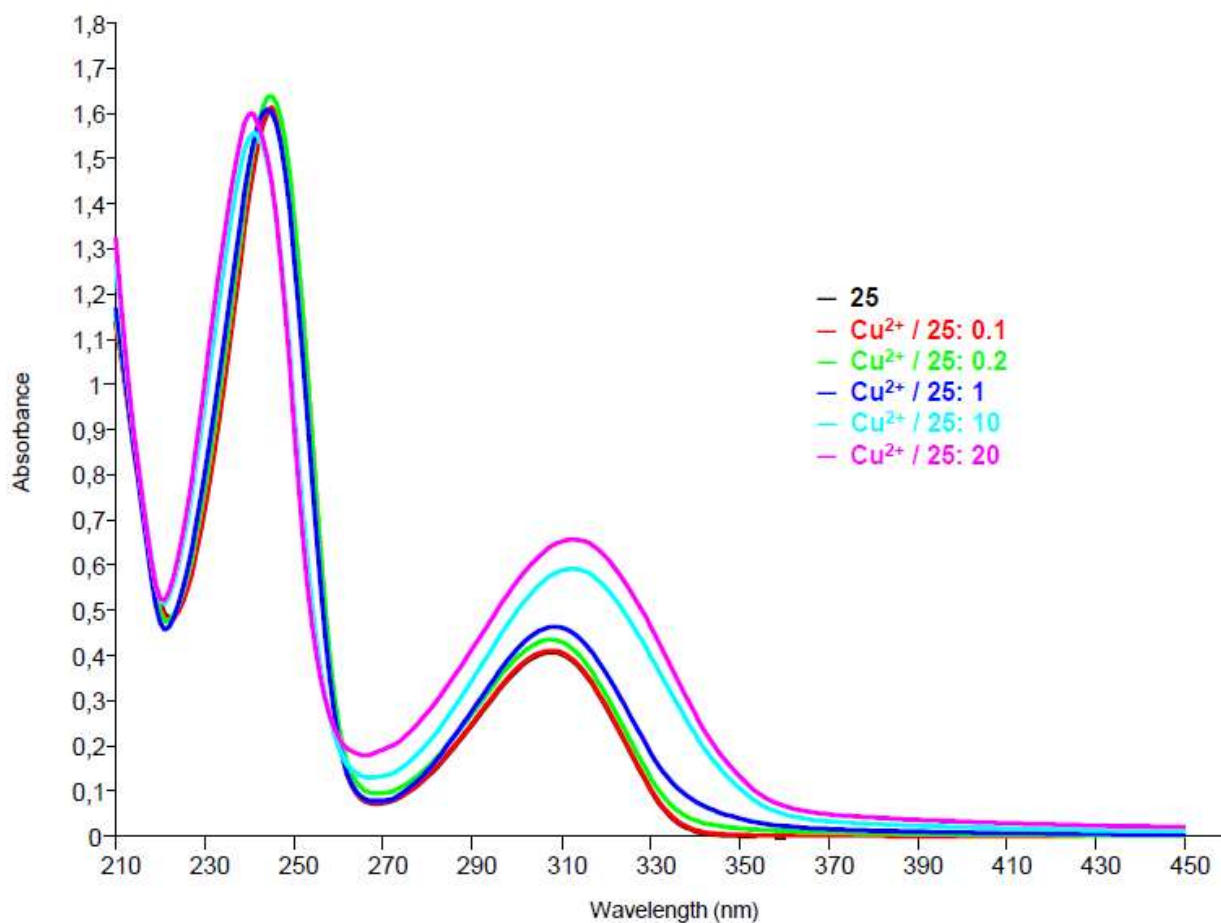

**Figure S37.** UV-Vis titration of ligand **25** with  $\text{Cu}^{2+}$ . The greatest variations in spectra with increasing amount of metal are observed at 270 and 330 nm, with an increase of absorbance.

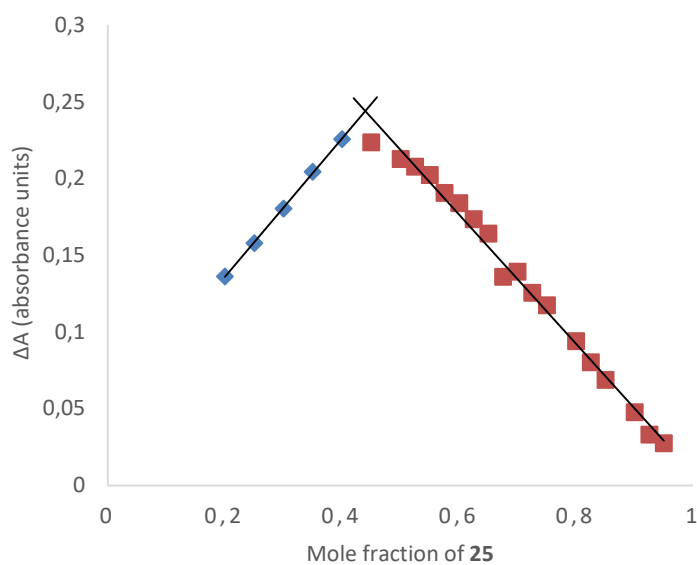

**Figure S38.** Job's plot of compound **25** in presence of  $\text{Cu}^{2+}$ : variation of the absorbance ( $\Delta A$ ) at the wavelength of 330 nm, in ordinate, versus the mole fraction of **25**, in abscissa. X (mole fraction that causes the maximum variation of absorbance) = 0.44; n (number of ligand molecules per cation) = 1.

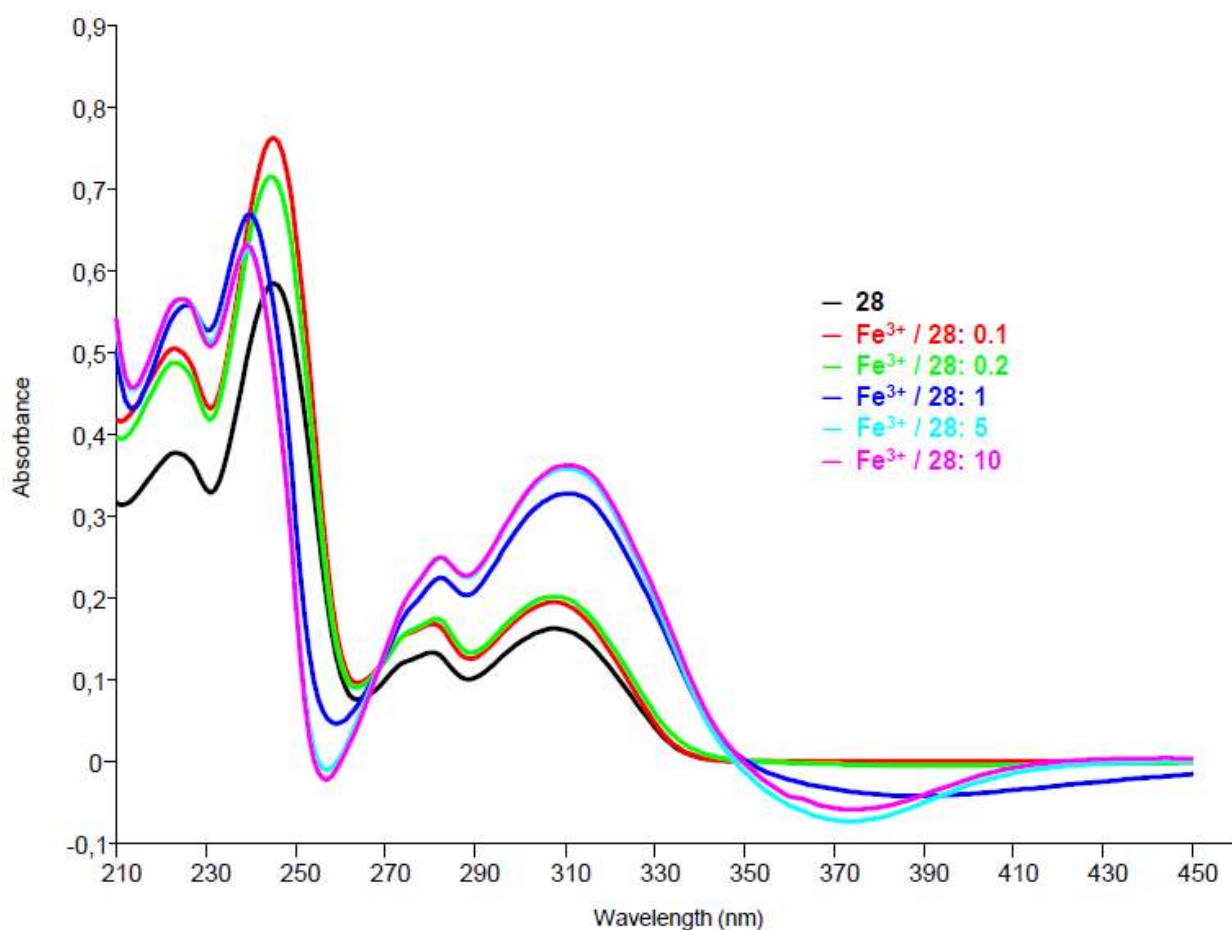

**Figure S39.** UV-Vis titration of ligand **28** with  $\text{Fe}^{3+}$ . The greatest variations in spectra with increasing amount of metal are observed at 222, 280 and 316 nm, with an increase of absorbance, and at 252 and 374 nm, with a reduction of absorbance. There are two isosbestic points at 267 and 348 nm.

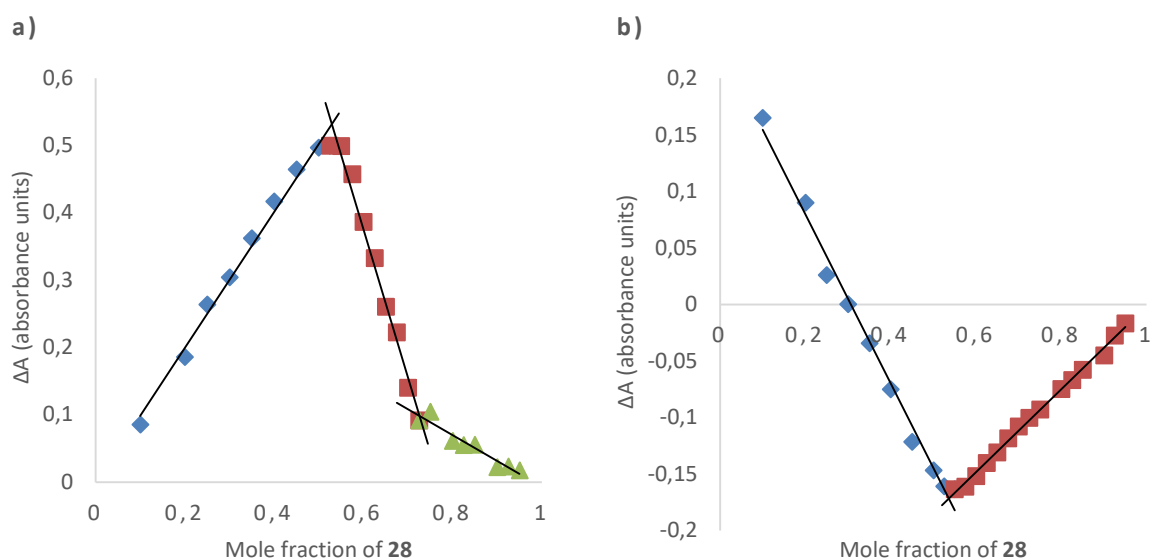

**Figure S40.** Job's plot of compound **28** in presence of  $\text{Fe}^{3+}$ : variation of the absorbance ( $\Delta A$ ) at the wavelength of 316 nm in **a**) or at 374 nm in **b**), in ordinate, versus the mole fraction of **28**, in abscissa.  $X_1$  (mole fraction that causes the maximum variation of absorbance) = 0.53;  $X_2 = 0.74$ ;  $n_1$  (number of ligand molecules per cation) = 1;  $n_2 = 3$ .

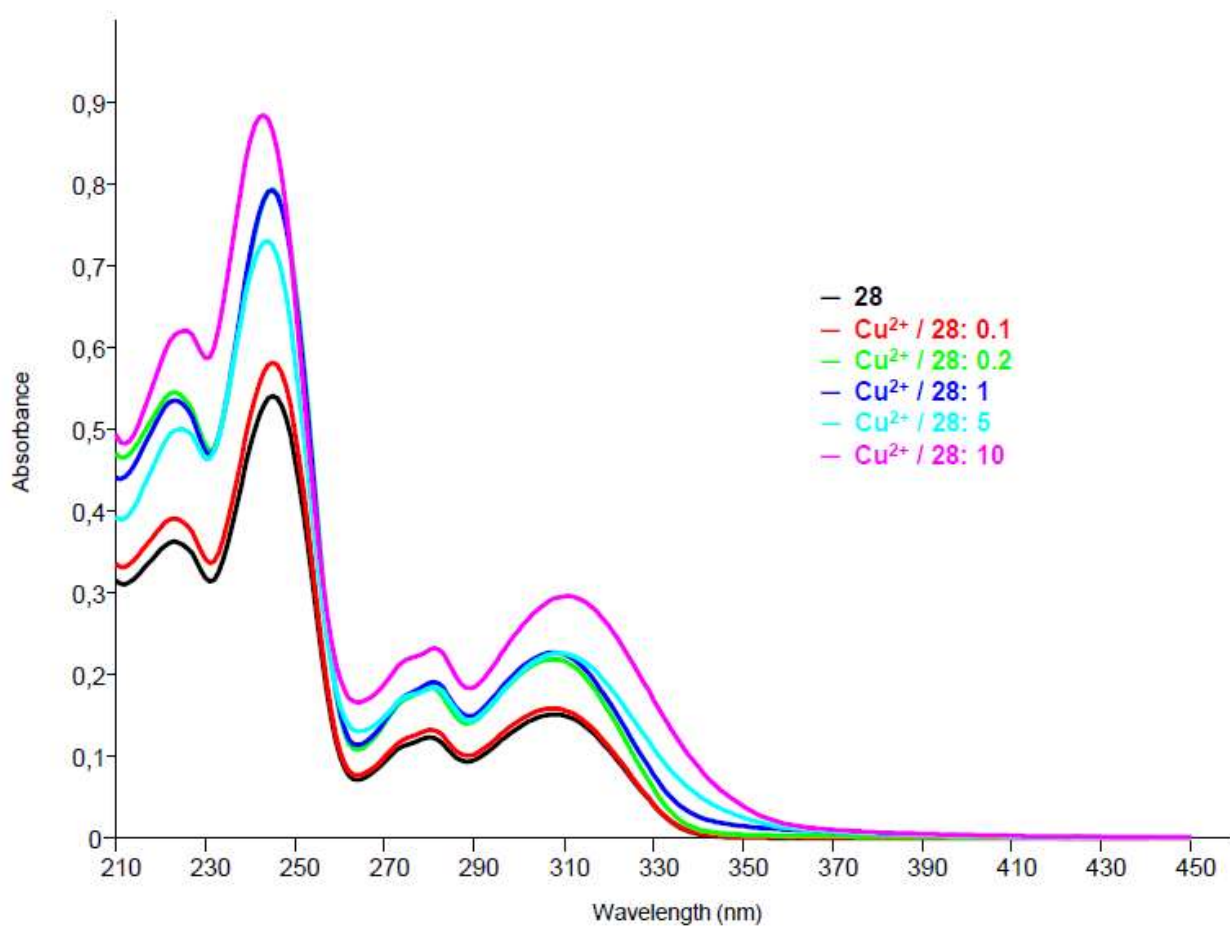

**Figure S41.** UV-Vis titration of ligand **28** with  $\text{Cu}^{2+}$ . The greatest variations in spectra with increasing amount of metal are observed at 222, 280 and 330 nm, with an increase of absorbance.

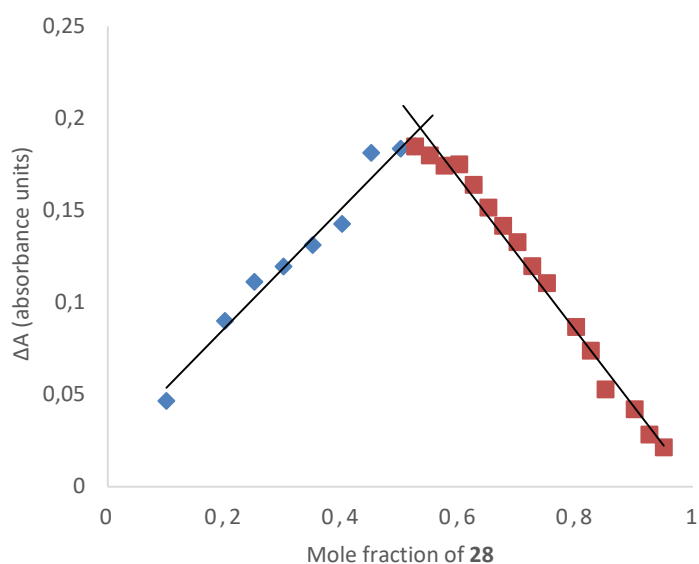

**Figure S42.** Job's plot of compound **28** in presence of  $\text{Cu}^{2+}$ : variation of the absorbance ( $\Delta A$ ) at the wavelength of 330 nm, in ordinate, versus the mole fraction of **28**, in abscissa. X (mole fraction that causes the maximum variation of absorbance) = 0.53; n (number of ligand molecules per cation) = 1.

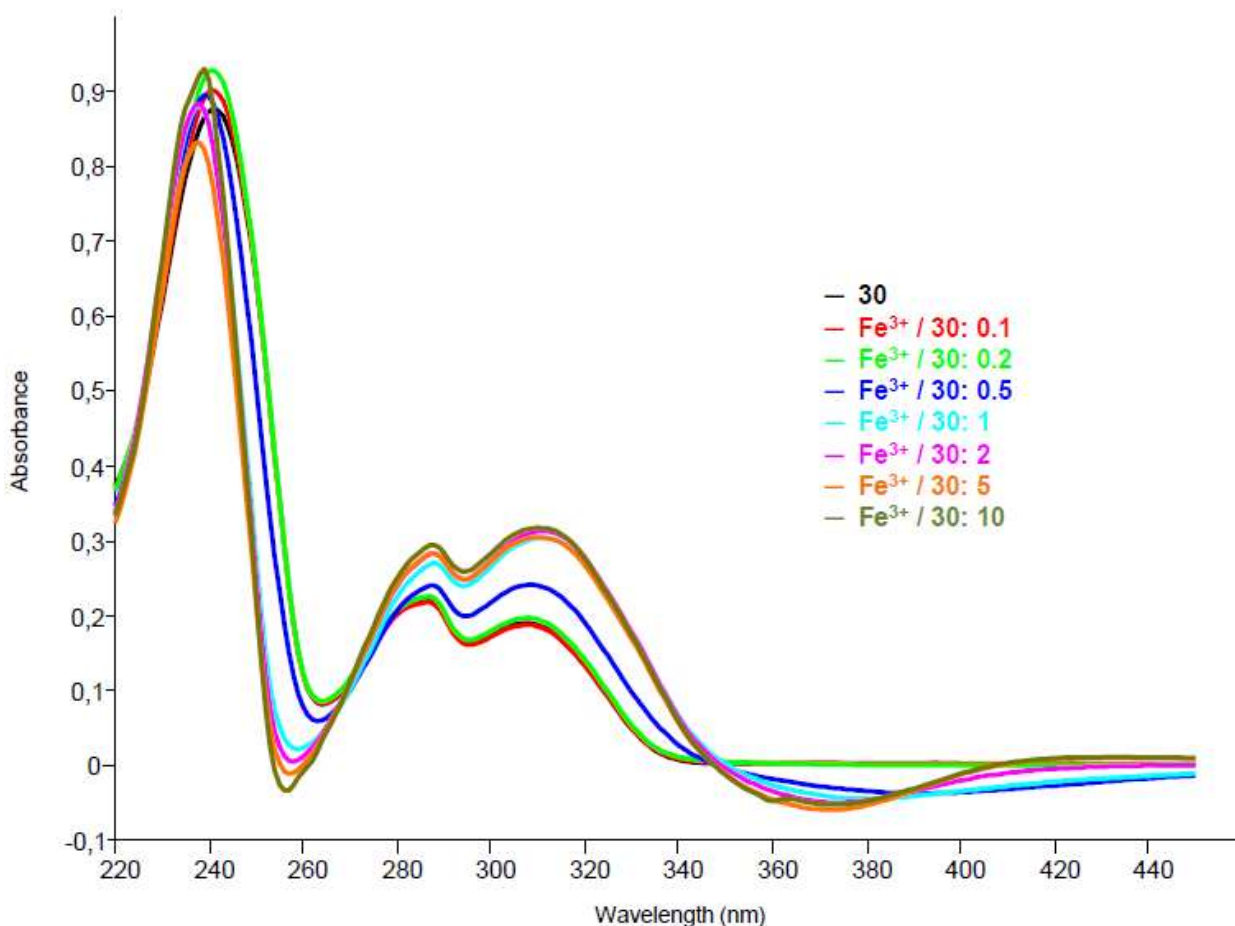

**Figure S43.** UV-Vis titration of ligand **30** with  $\text{Fe}^{3+}$ . The greatest variations in spectra with increasing amount of metal are observed at 256 and 372 nm, with a reduction of absorbance, and at 287 and 312 nm, with an increase of absorbance. There are two isosbestic points at 270 and 347 nm.

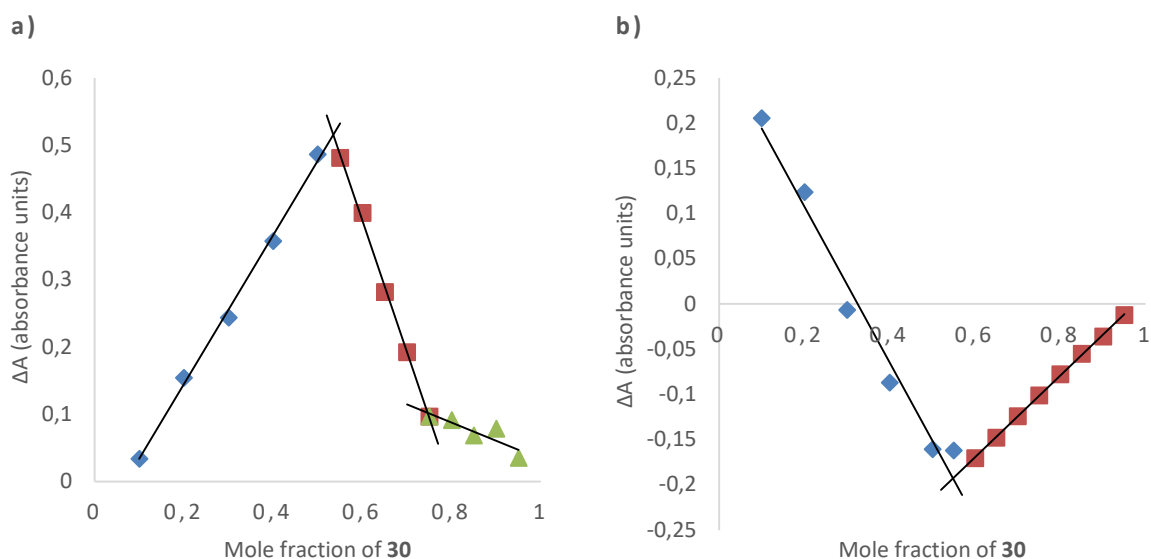

**Figure S44.** Job's plot of compound **30** in presence of  $\text{Fe}^{3+}$ : variation of the absorbance ( $\Delta A$ ) at the wavelength of 310 nm in **a**) or at 372 nm in **b**), in ordinate, versus the mole fraction of **30**, in abscissa.  $X_1$  (mole fraction that causes the maximum variation of absorbance) = 0.53 in **a**), 0.55 in **b**);  $X_2 = 0.74$  in **a**);  $n_1$  (number of ligand molecules per cation) = 1;  $n_2 = 3$ .

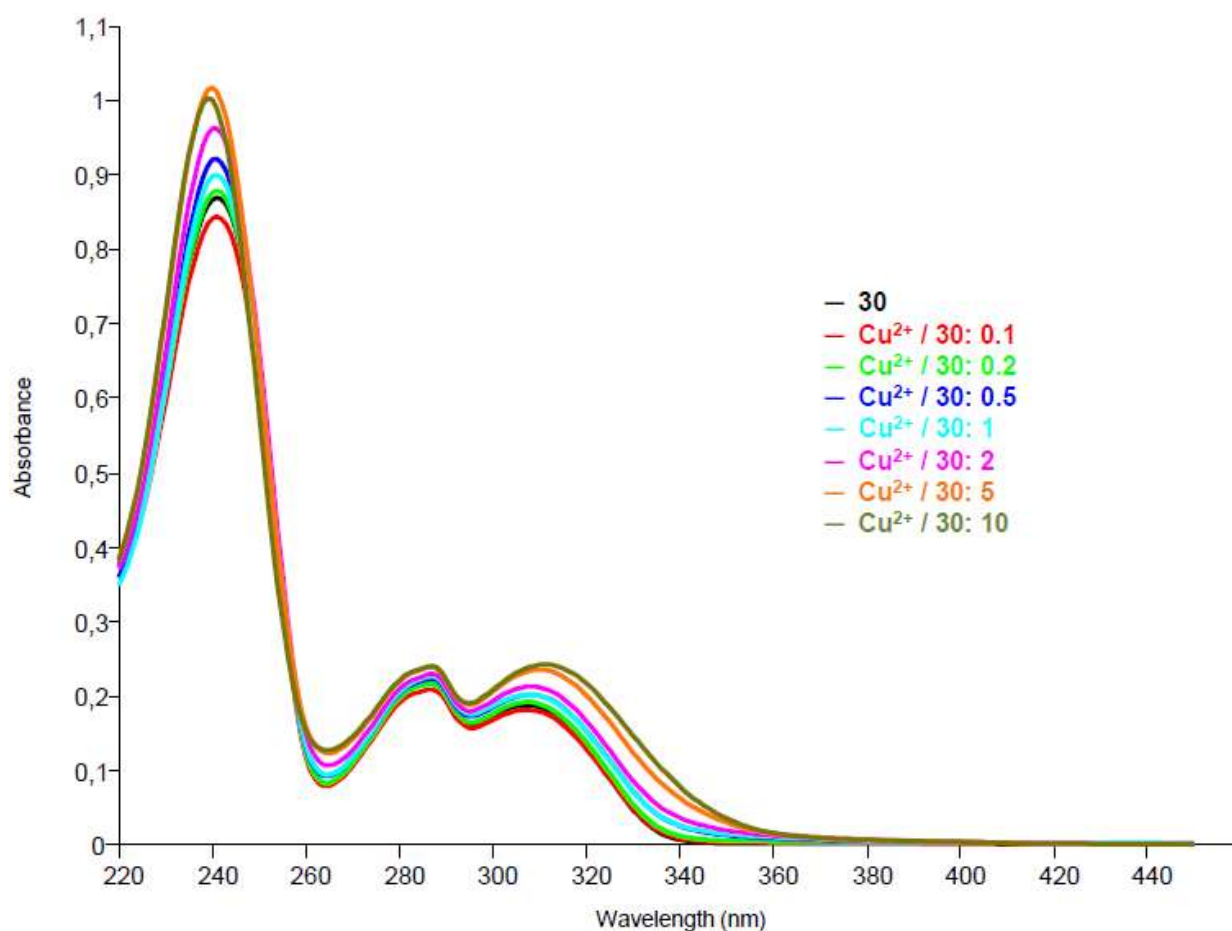

**Figure S45.** UV-Vis titration of ligand **30** with  $\text{Cu}^{2+}$ . The greatest variations in spectra with increasing amount of metal are observed at 265, 312 and 330 nm, with an increase of absorbance.

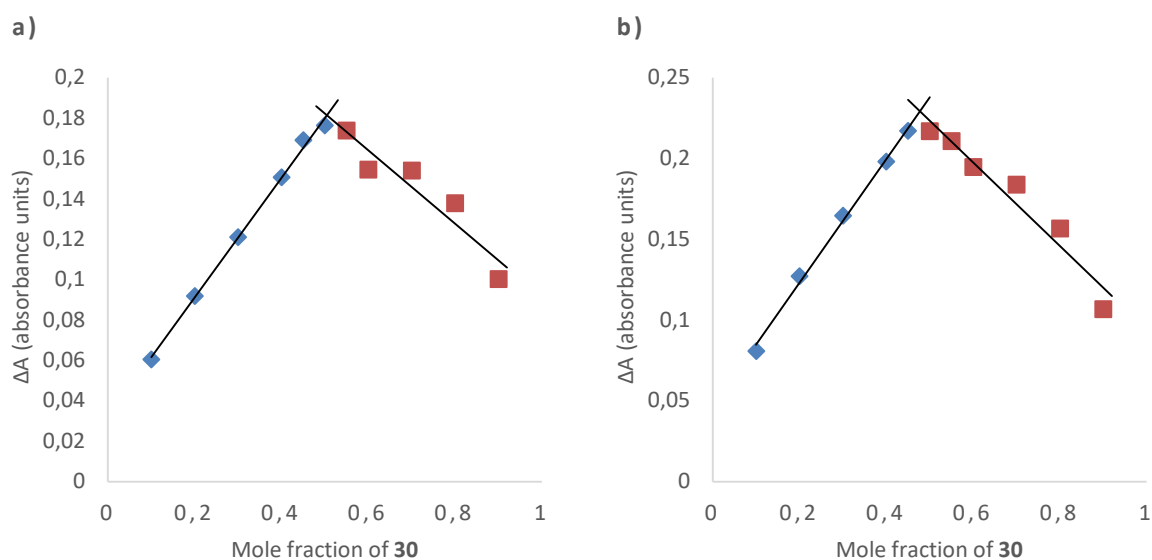

**Figure S46.** Job's plot of compound **30** in presence of  $\text{Cu}^{2+}$ : variation of the absorbance ( $\Delta A$ ) at the wavelength of 312 nm in **a**) or at 330 nm in **b**), in ordinate, versus the mole fraction of **30**, in abscissa. X (mole fraction that causes the maximum variation of absorbance) = 0.50 in **a**), 0.48 in **b**); n (number of ligand molecules per cation) = 1.
